# Supplementary material
Source: MDPI journal article supplement (https://www.mdpi.com/search?q=molecules-25-00158)
Supplement: s001 [file molecules-25-00158-s001.pdf]

# Supplementary Materials: Cytotoxicity Meroterpenoids from the Fungus *Ganoderma sinensis* and First Absolute Configuration Clarification of Zizhine H

Yan-Jiao Yin, Dan-Ling Huang, Bin Qiu, Dan Cai, Jiao-Jiao Zhang, Shao-Xiang Wang, Da-Peng Qin, and Yong-Xian Cheng

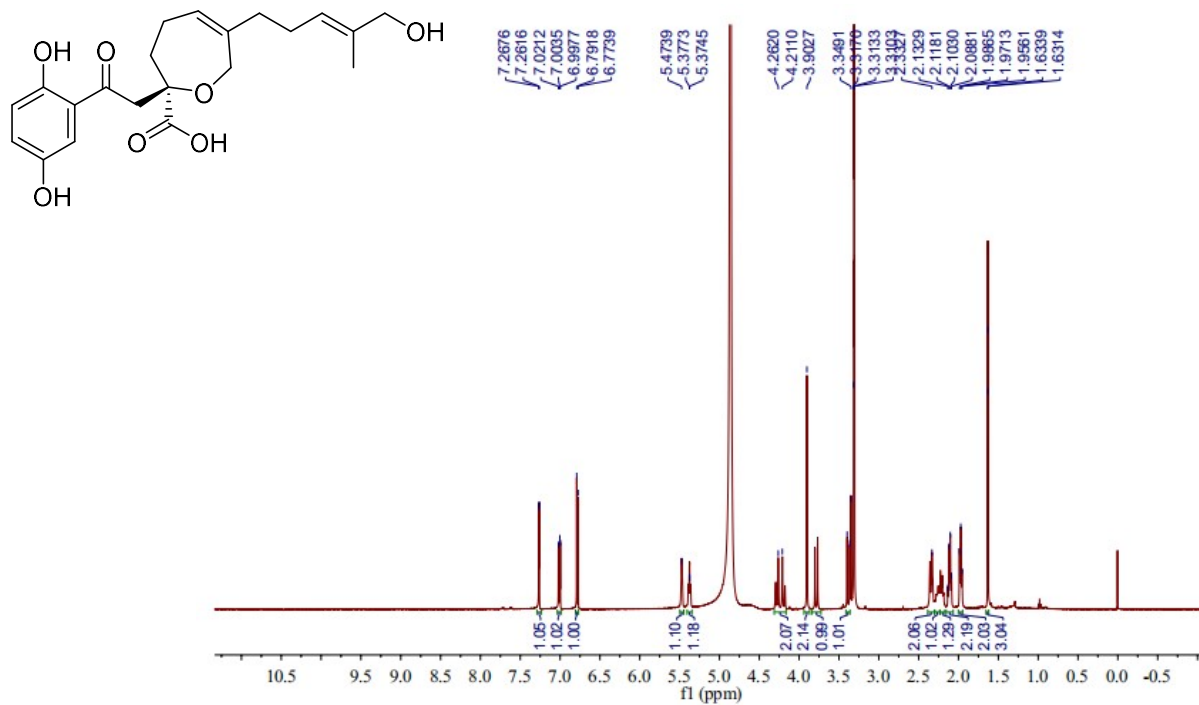

Figure S1. <sup>1</sup>H NMR spectrum of 1 in methanol-*d*<sub>4</sub>.

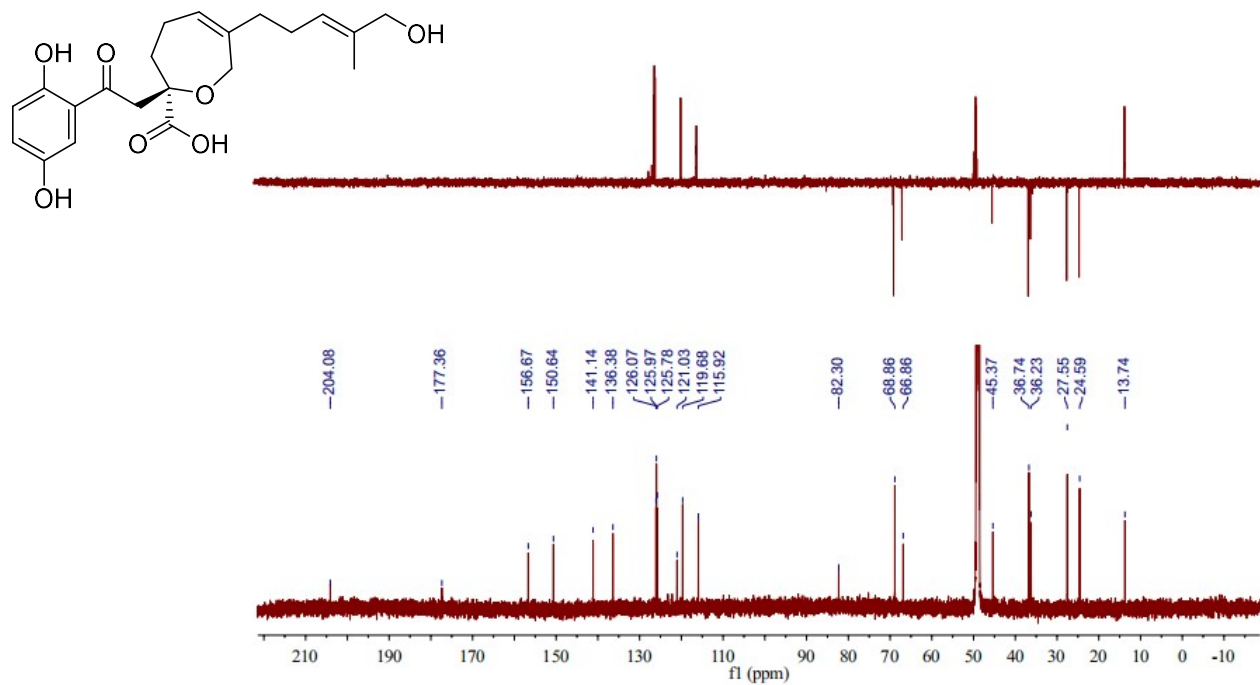

**Figure S2.**  $^{13}\text{C}$  NMR and DEPT spectra of **1** in methanol- $d_4$ .

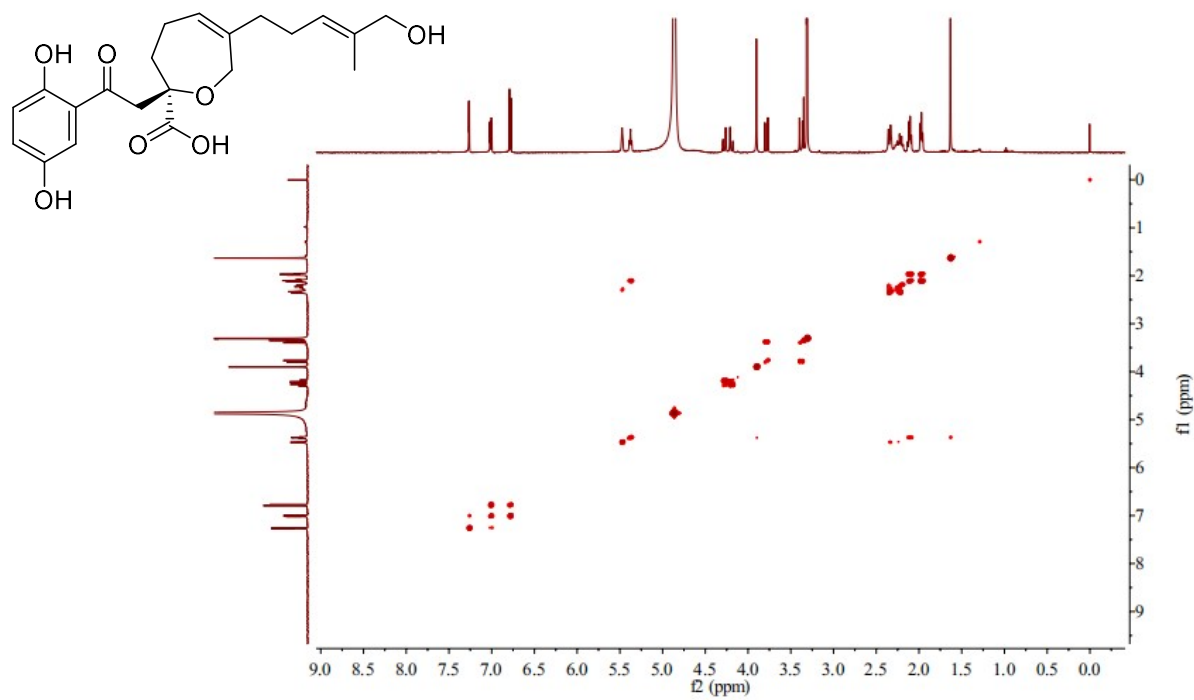

**Figure S3.**  $^1\text{H}$ - $^1\text{H}$  COSY spectrum of **1** in methanol- $d_4$ .

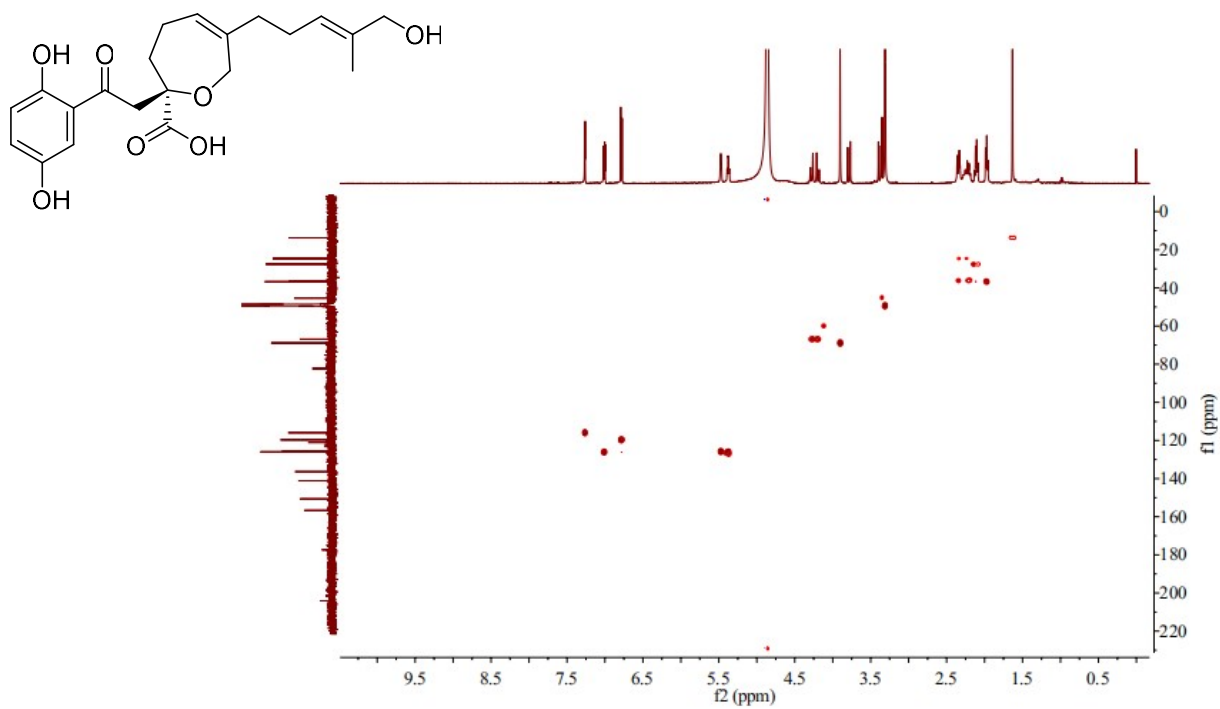

**Figure S4.** HSQC spectrum of **1** in methanol-*d*<sub>4</sub>.

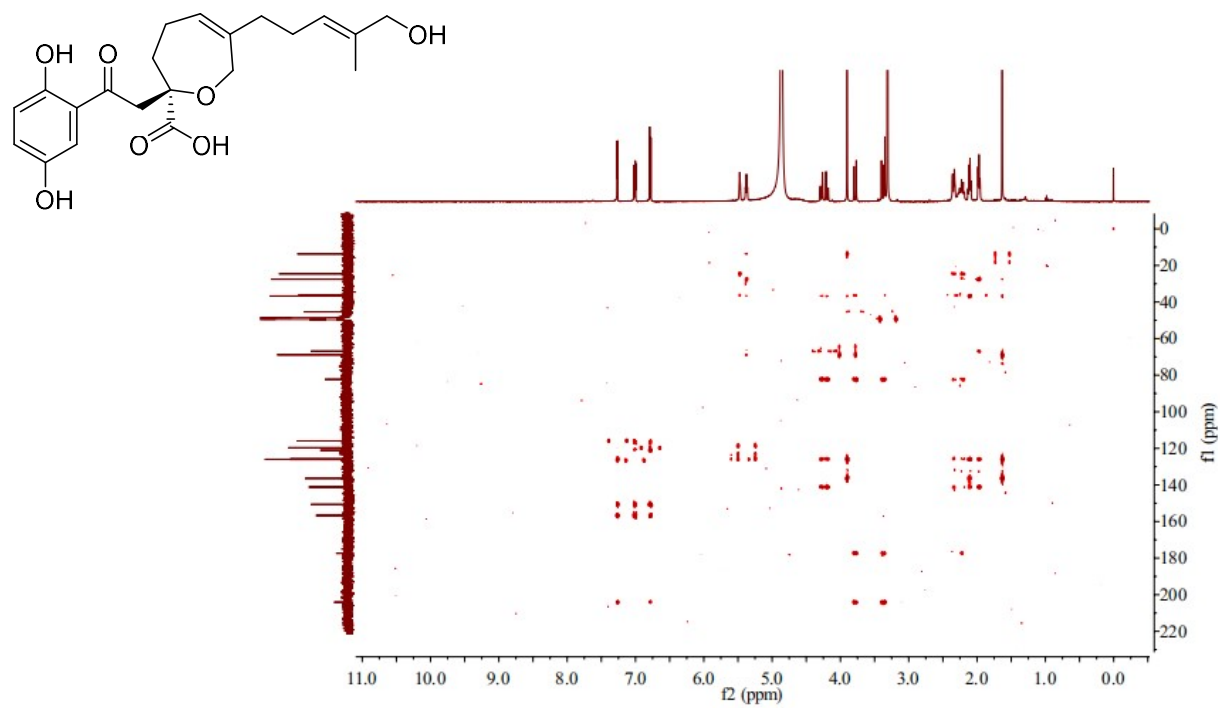

**Figure S5.** HMBC spectrum of **1** in methanol-*d*<sub>4</sub>.

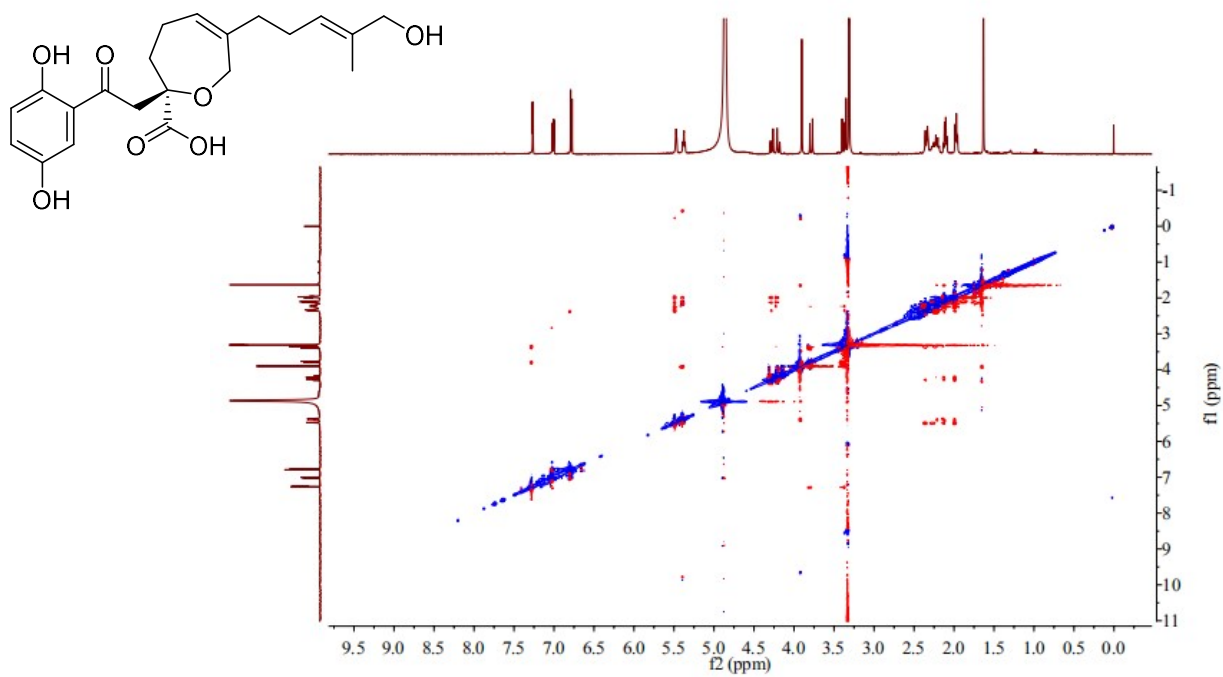

Figure S6. ROESY spectrum of 1 in methanol-*d*<sub>4</sub>.

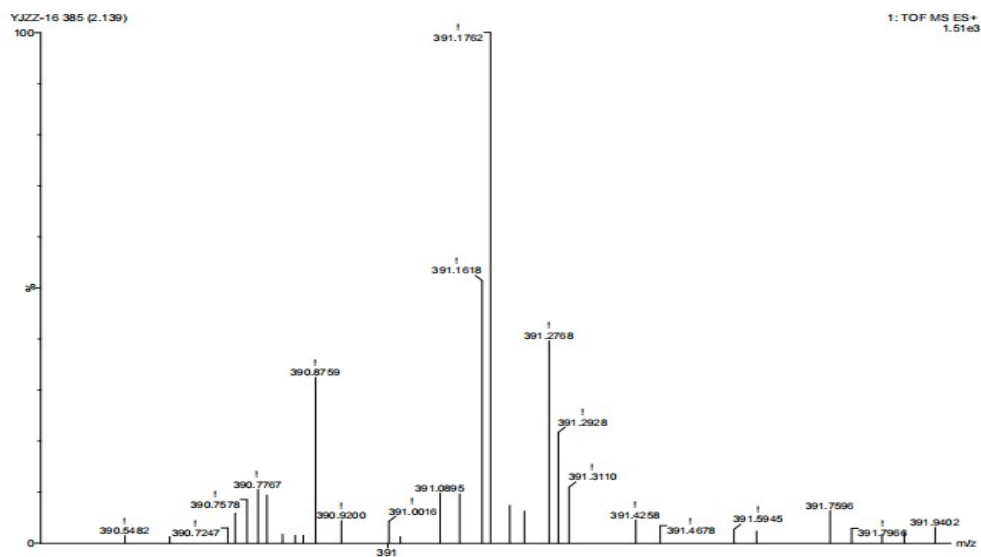



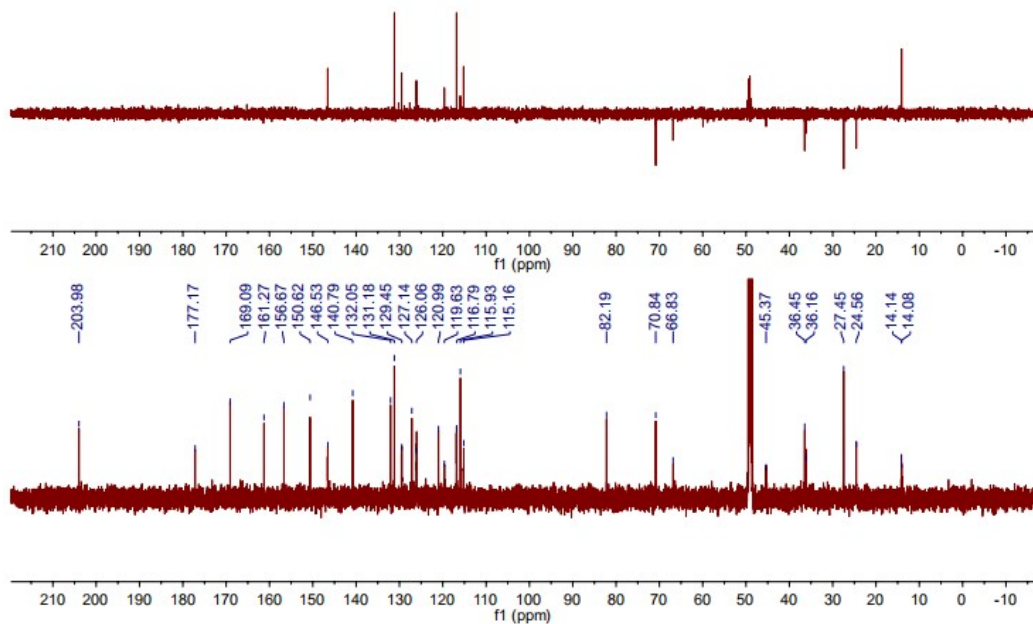

**Figure S9.**  $^{13}\text{C}$  NMR and DEPT spectra of **2** in methanol- $d_4$ .

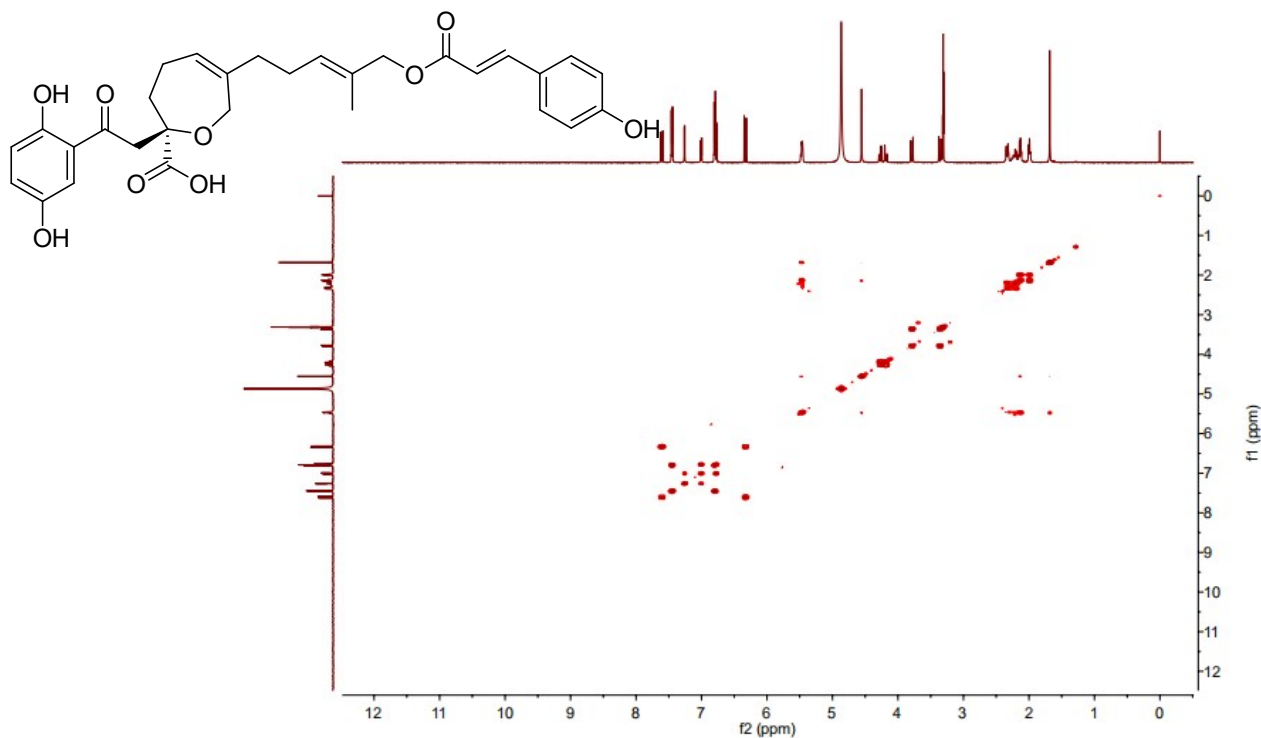

**Figure S10.**  $^1\text{H}$ - $^1\text{H}$  COSY spectrum of **2** in methanol- $d_4$ .

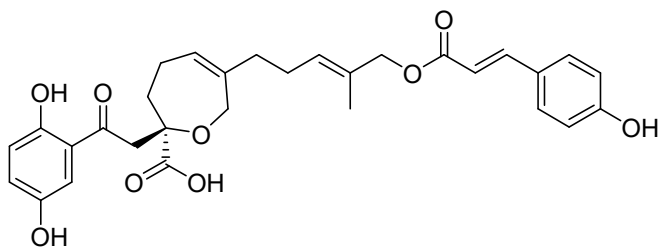

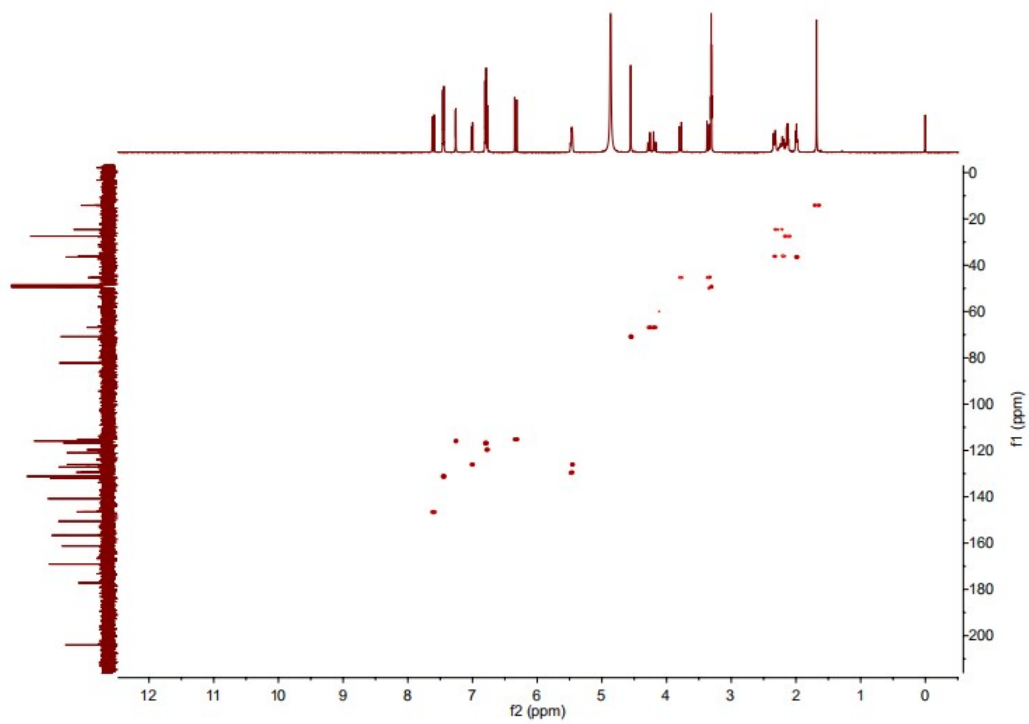

**Figure S11.** HSQC spectrum of **2** in methanol-*d*<sub>4</sub>.

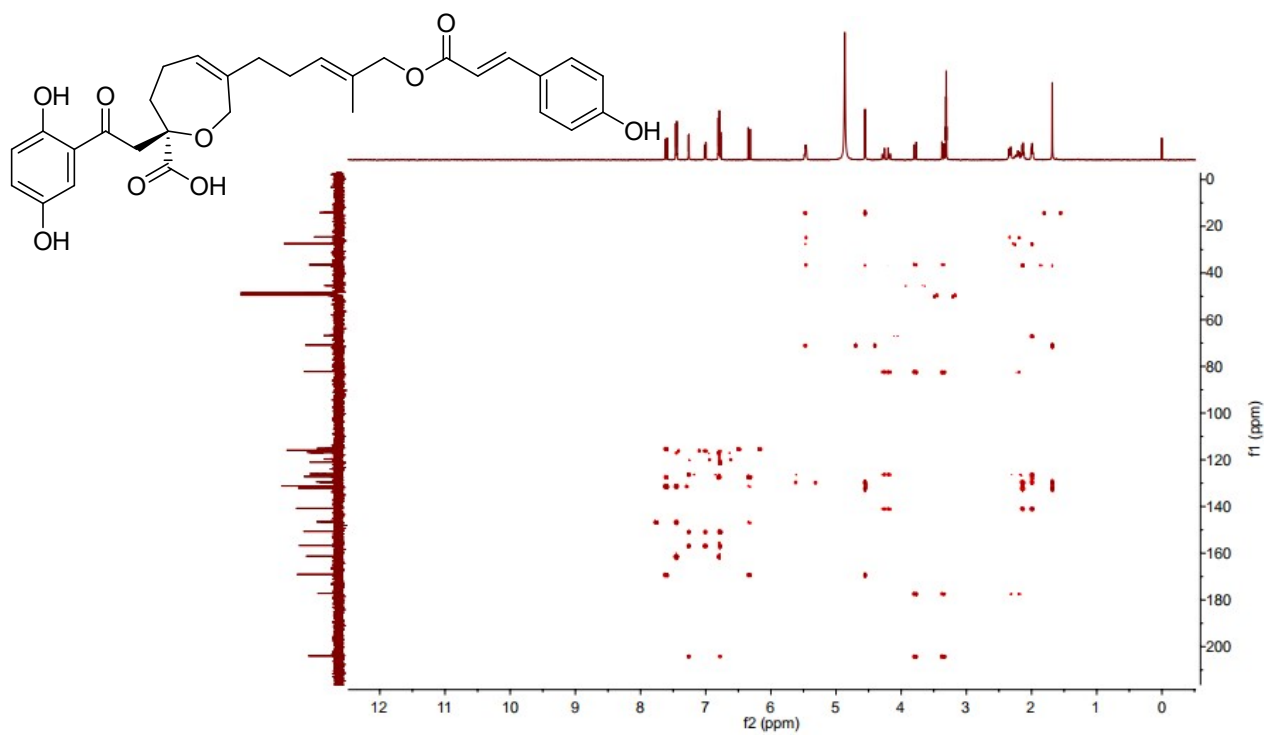

**Figure S12.** HMBC spectrum of **2** in methanol-*d*<sub>4</sub>.

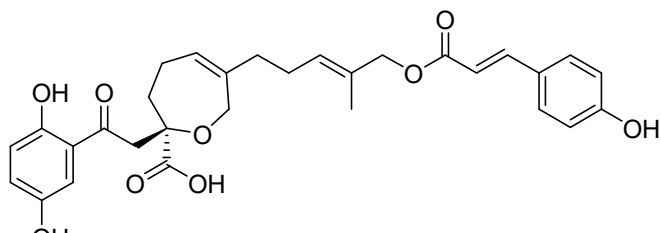

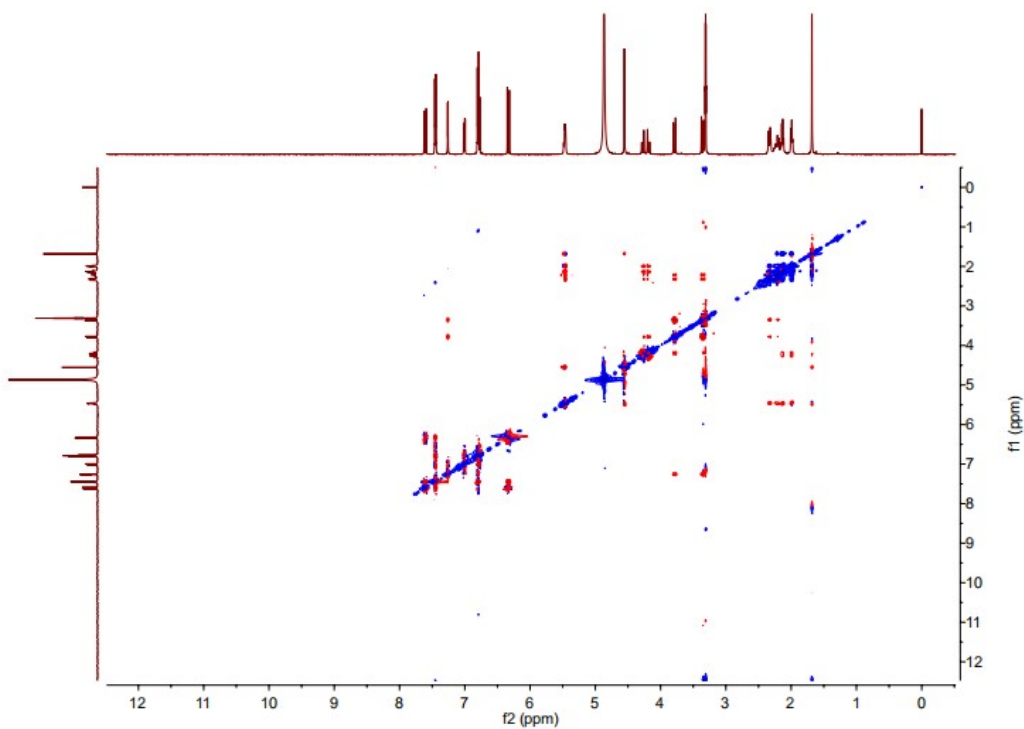

Figure S13. ROESY spectrum of 2 in methanol-*d*<sub>4</sub>.

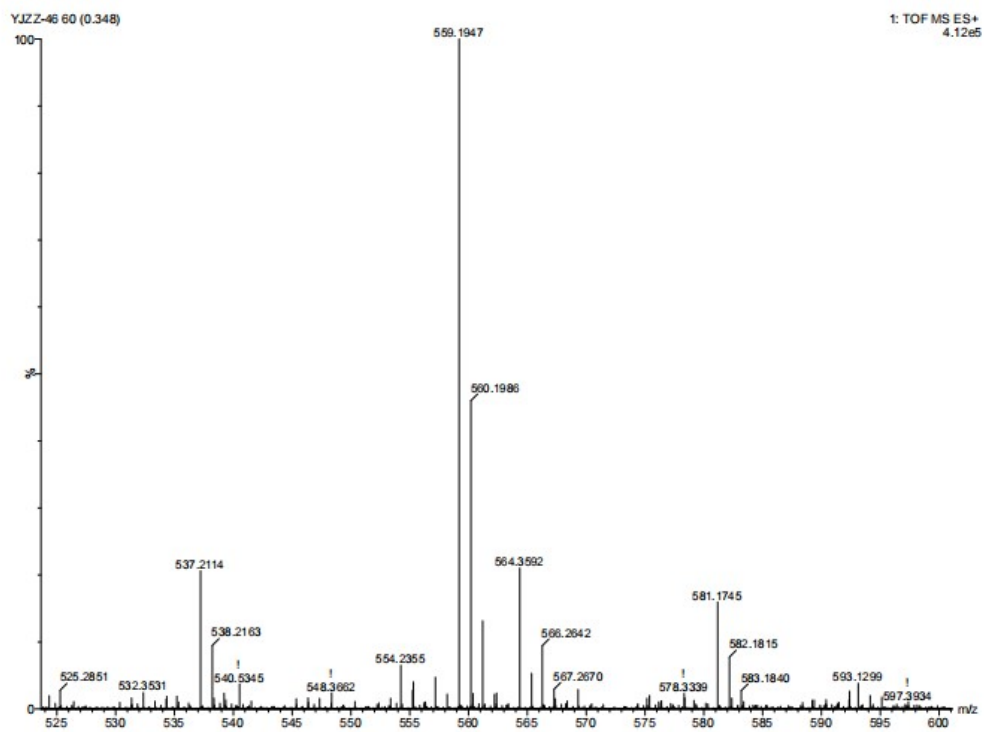



### Single Mass Analysis

Tolerance = 10.0 PPM / DBE: min = -1.5, max = 50.0

Element prediction: Off

Number of isotope peaks used for i-FIT = 3

Monoisotopic Mass, Even Electron Ions

100 formula(e) evaluated with 1 results within limits (up to 50 closest results for each mass)

Elements Used:

C: 30-30 H: 0-50 N: 0-5 O: 1-10 Na: 0-1

YJZZ-46 60 (0.348)

1: TOF MS ES+

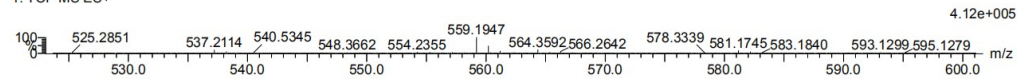

Minimum: 20.0 10.0 -1.5  
Maximum: 50.0 50.0

| Mass     | Calc. Mass | mDa | PPM | DBE  | i-FIT | Norm | Conf (%) | Formula       |
|----------|------------|-----|-----|------|-------|------|----------|---------------|
| 559.1947 | 559.1944   | 0.3 | 0.5 | 14.5 | 763.1 | n/a  | n/a      | C30 H32 O9 Na |

Figure S14. HRESIMS of 2.

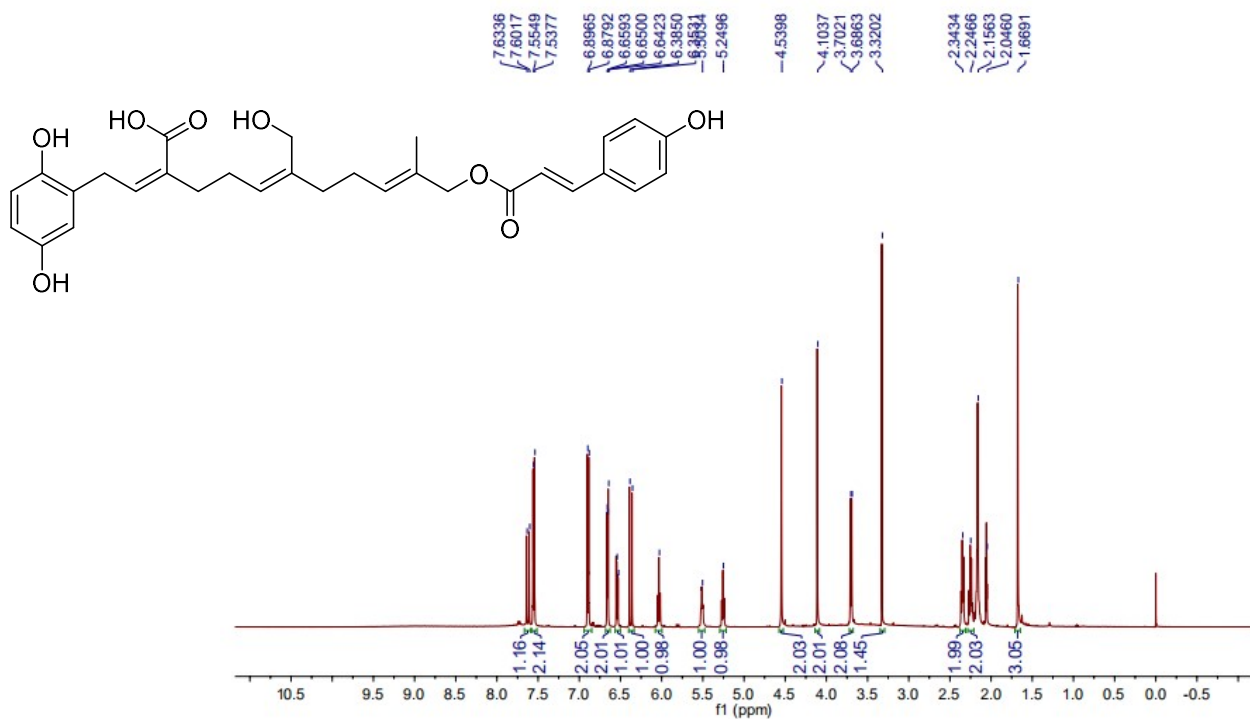

Figure S15. <sup>1</sup>H NMR spectrum of 3 in acetone-*d*<sub>6</sub>.

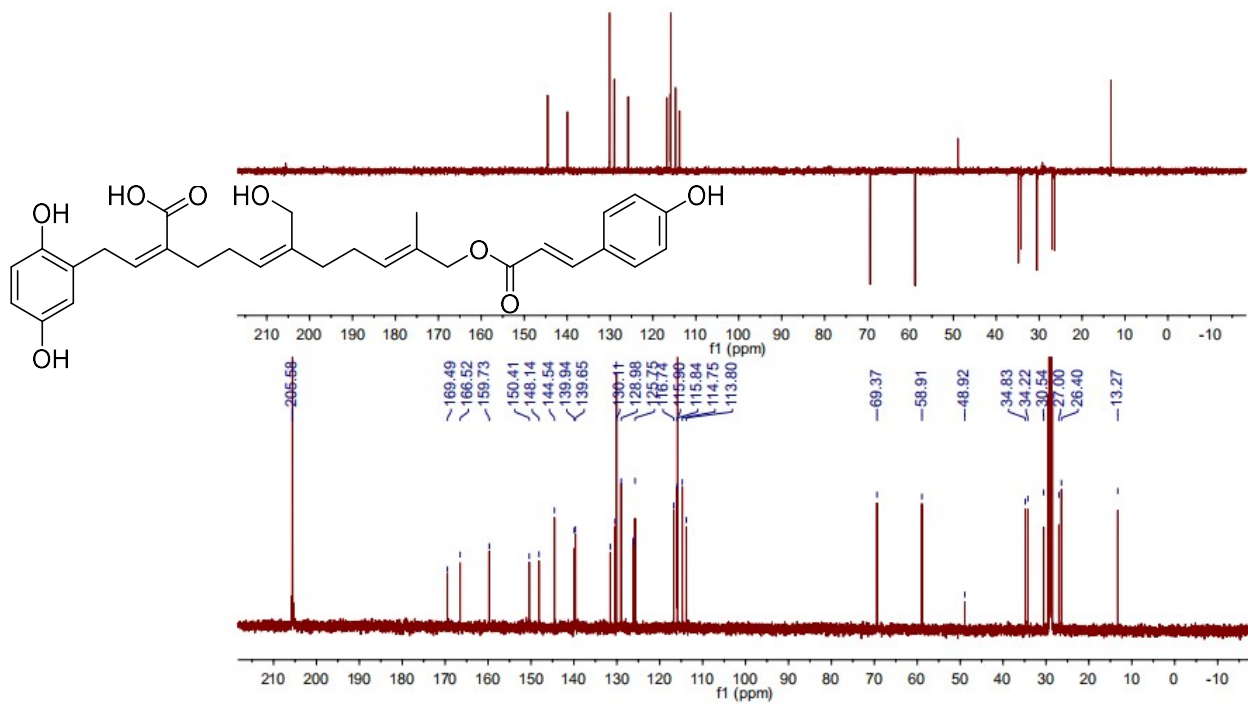

**Figure S16.**  $^{13}\text{C}$  NMR and DEPT spectra of **3** in acetone- $d_6$ .

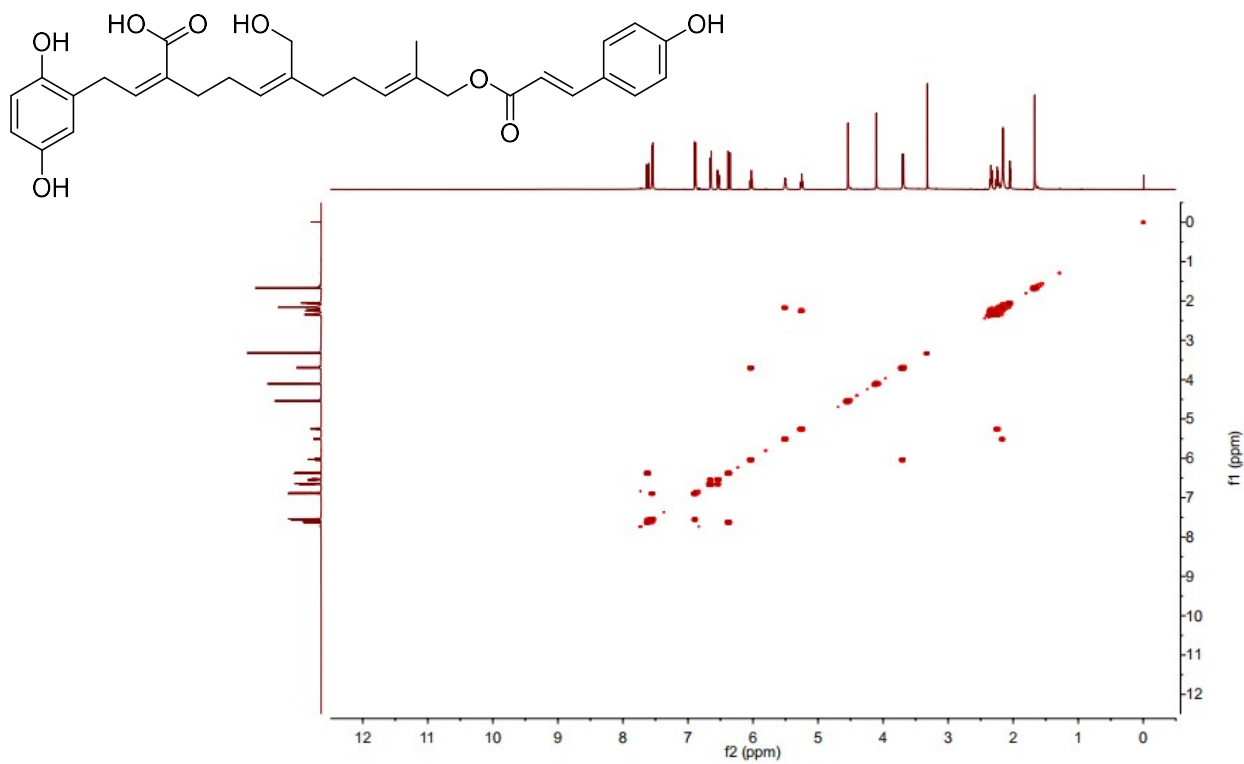

**Figure S17.**  $^1\text{H}$ - $^1\text{H}$  COSY spectra of **3** in acetone- $d_6$ .

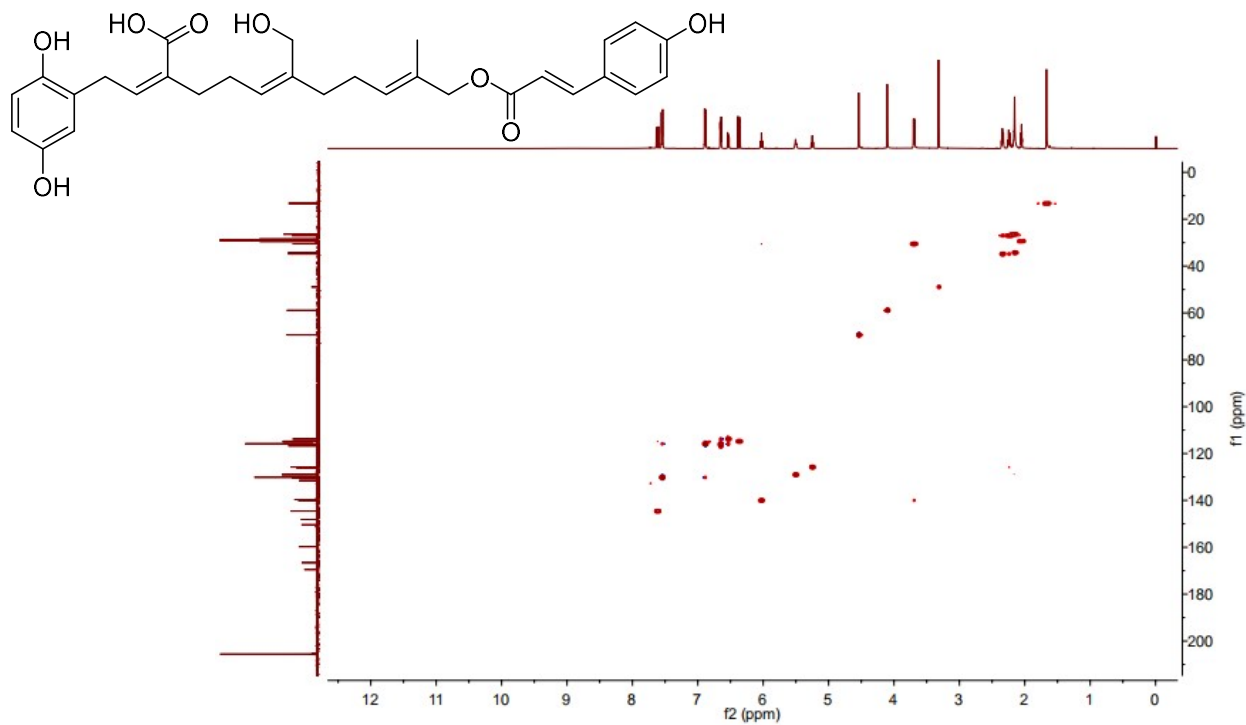

Figure S18. HSQC spectrum of 3 in acetone- $d_6$ .

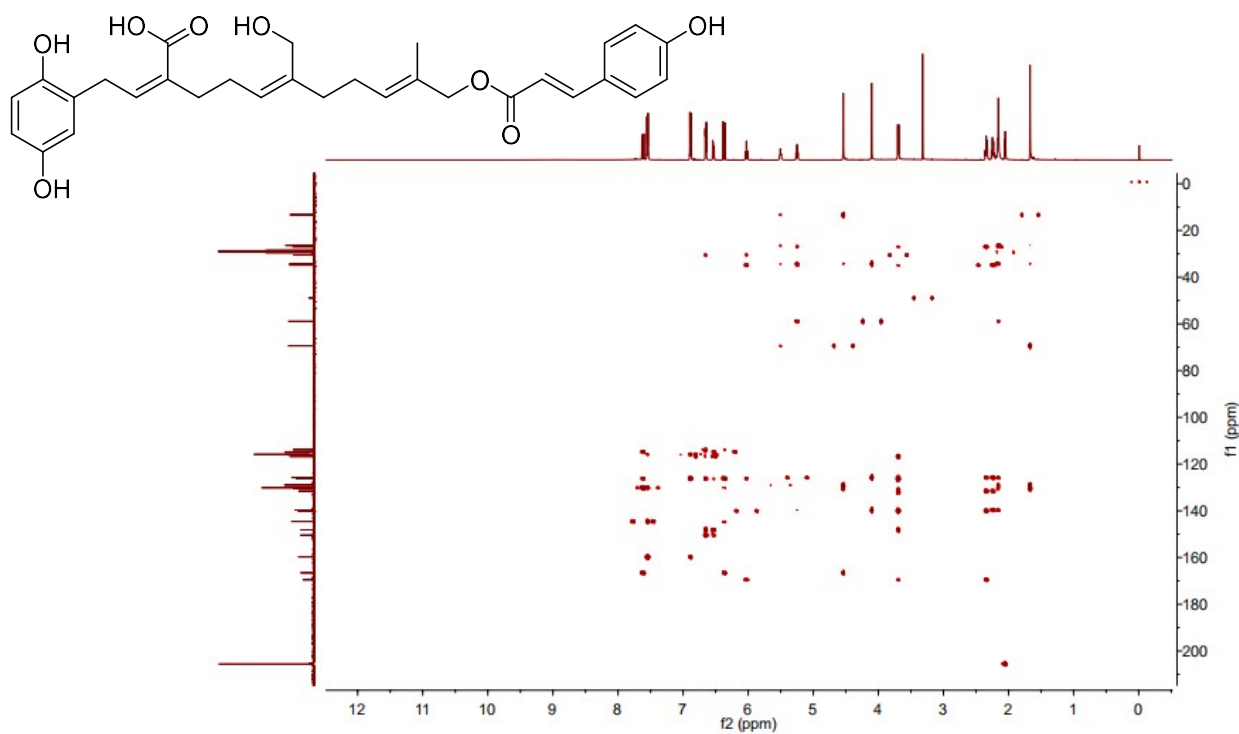

Figure S19. HMBC spectrum of 3 in acetone- $d_6$ .

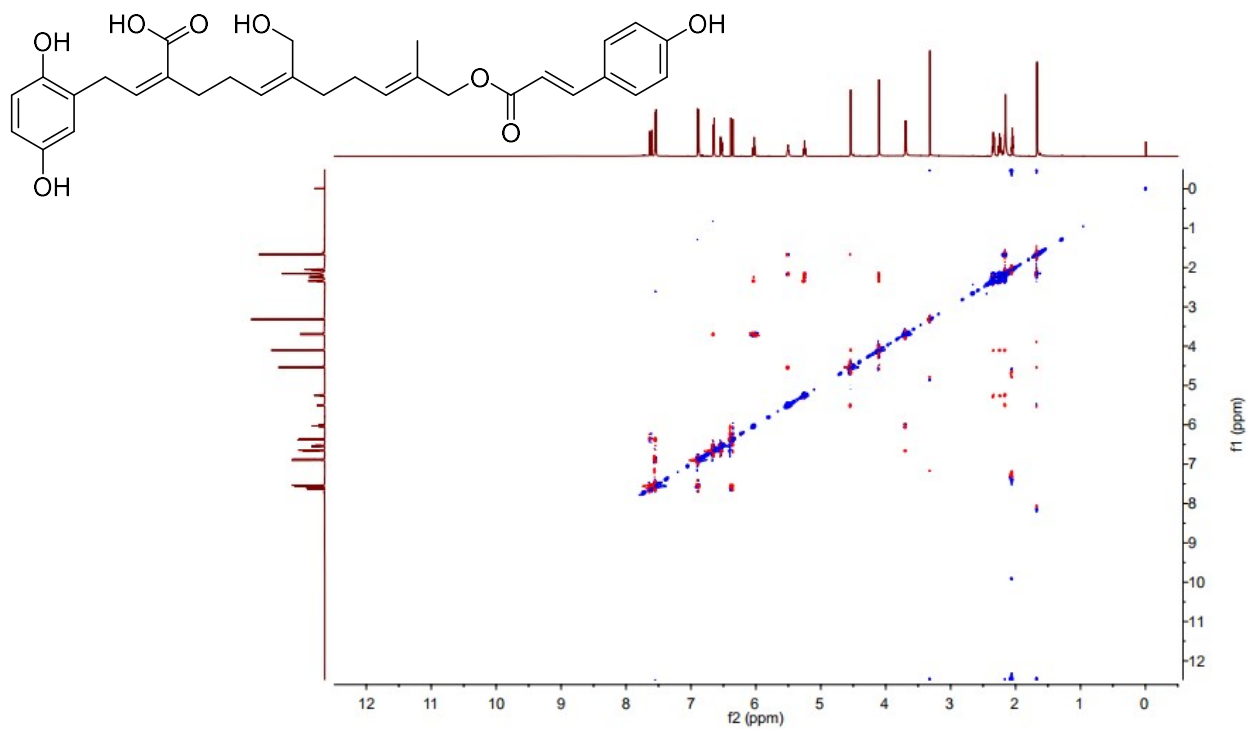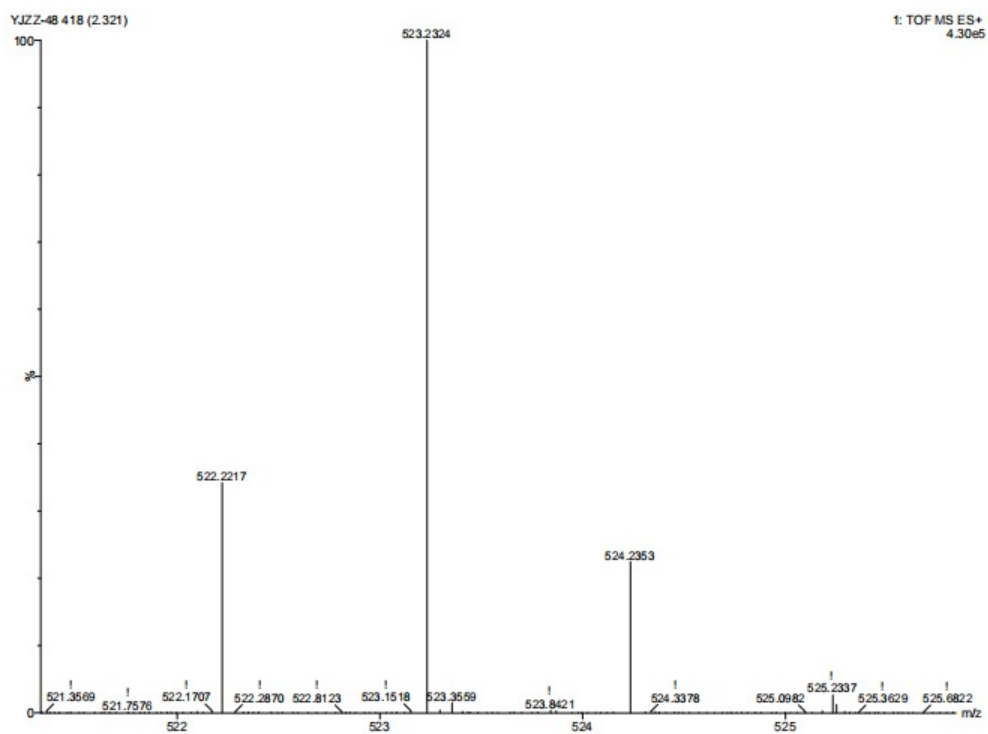

### Single Mass Analysis

Tolerance = 10.0 PPM / DBE: min = -1.5, max = 50.0

Element prediction: Off

Number of isotope peaks used for i-FIT = 3

Monoisotopic Mass, Even Electron Ions

81 formula(e) evaluated with 1 results within limits (up to 50 closest results for each mass)

Elements Used:

C: 30-30 H: 0-50 N: 0-4 O: 1-10 Na: 0-1

YJZZ-48 418 (2.321)

1: TOF MS ES+

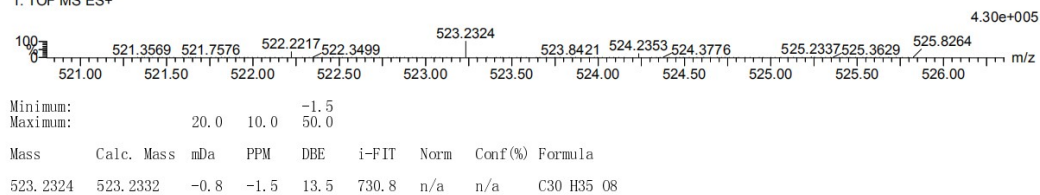

Figure S21. HRESIMS of 3.

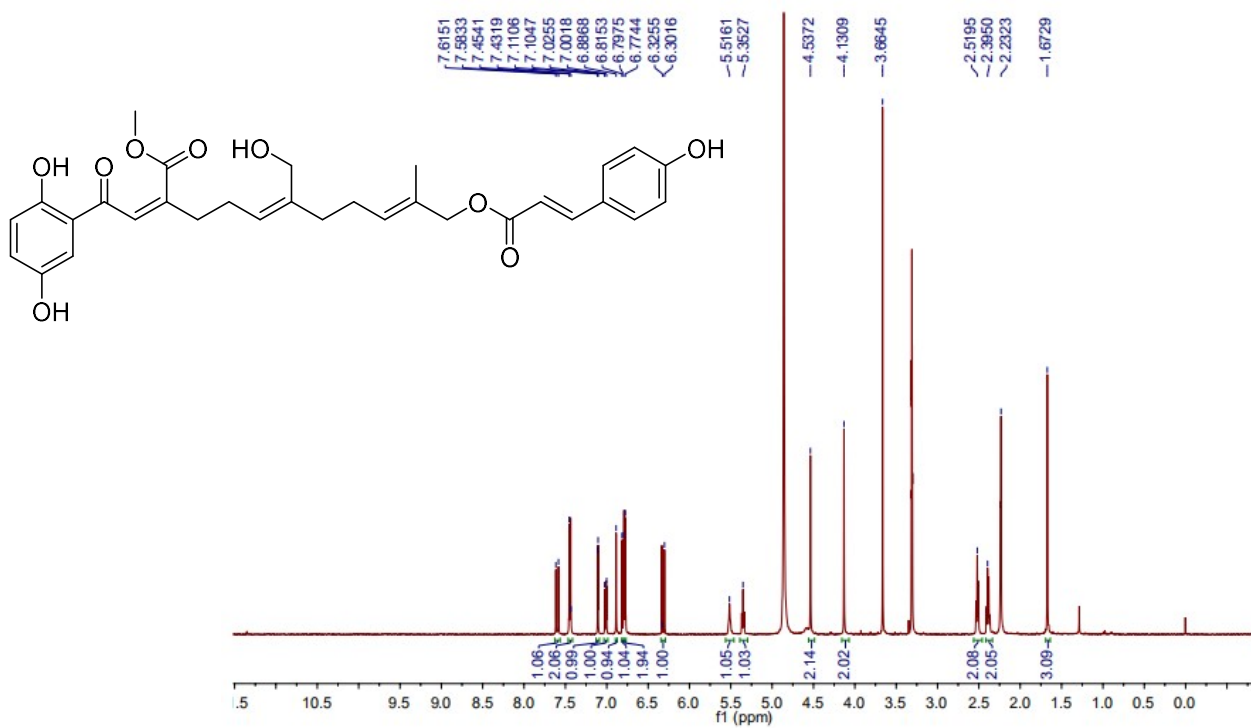

Figure S22. <sup>1</sup>H NMR spectrum of 4 in methanol-*d*<sub>4</sub>.

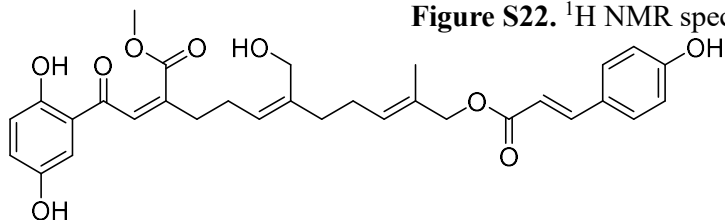



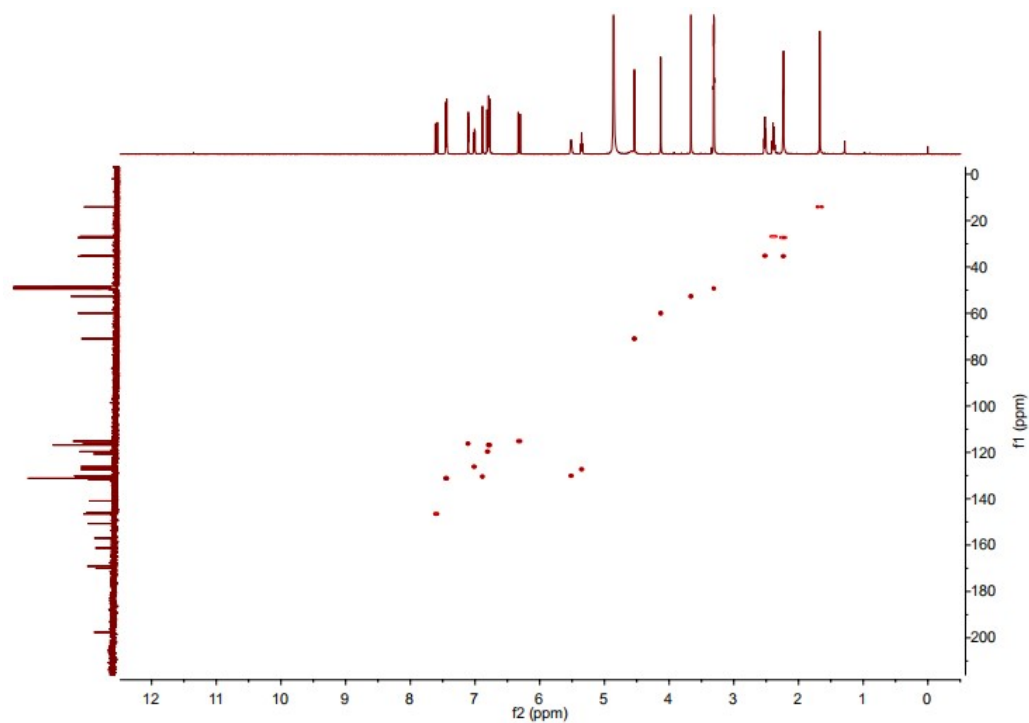

**Figure S25.** HSQC spectrum of 4 in methanol-*d*<sub>4</sub>.

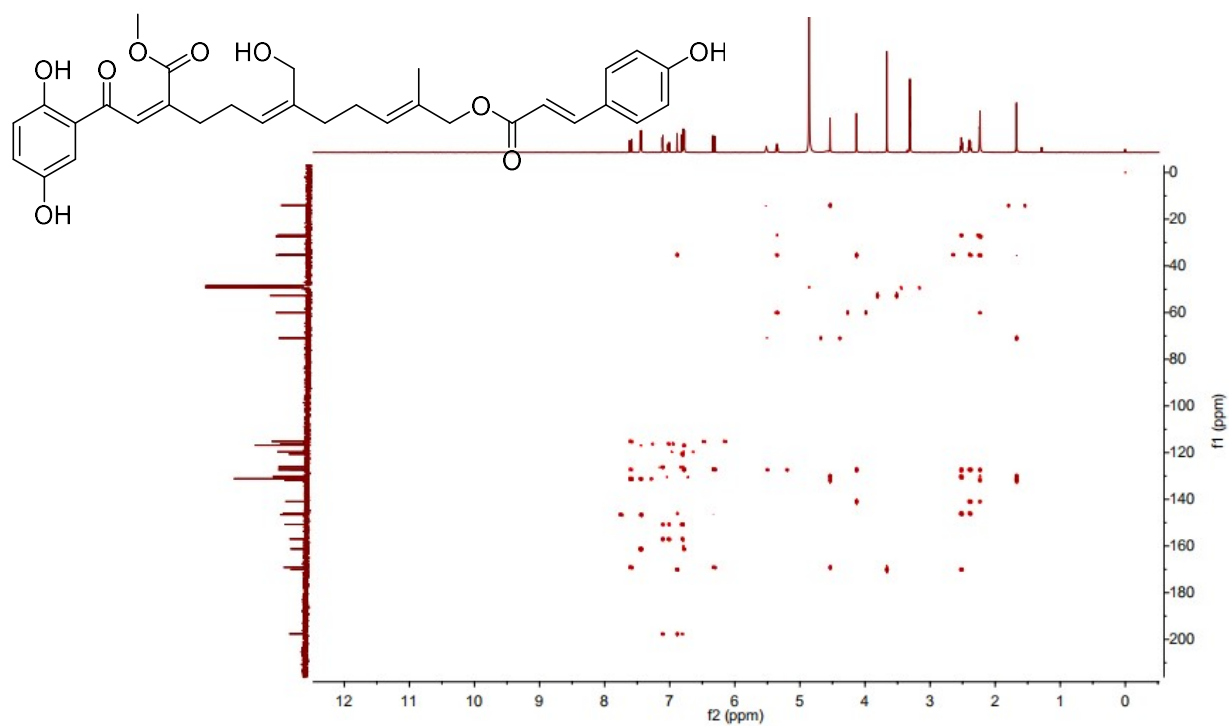

**Figure S26.** HMBC spectrum of 4 in methanol-*d*<sub>4</sub>.

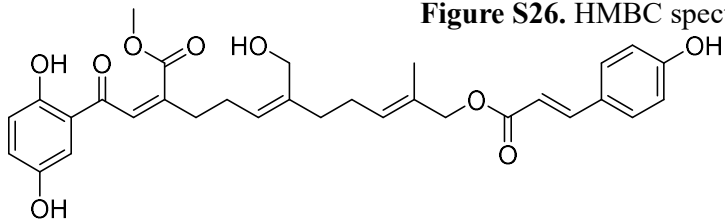

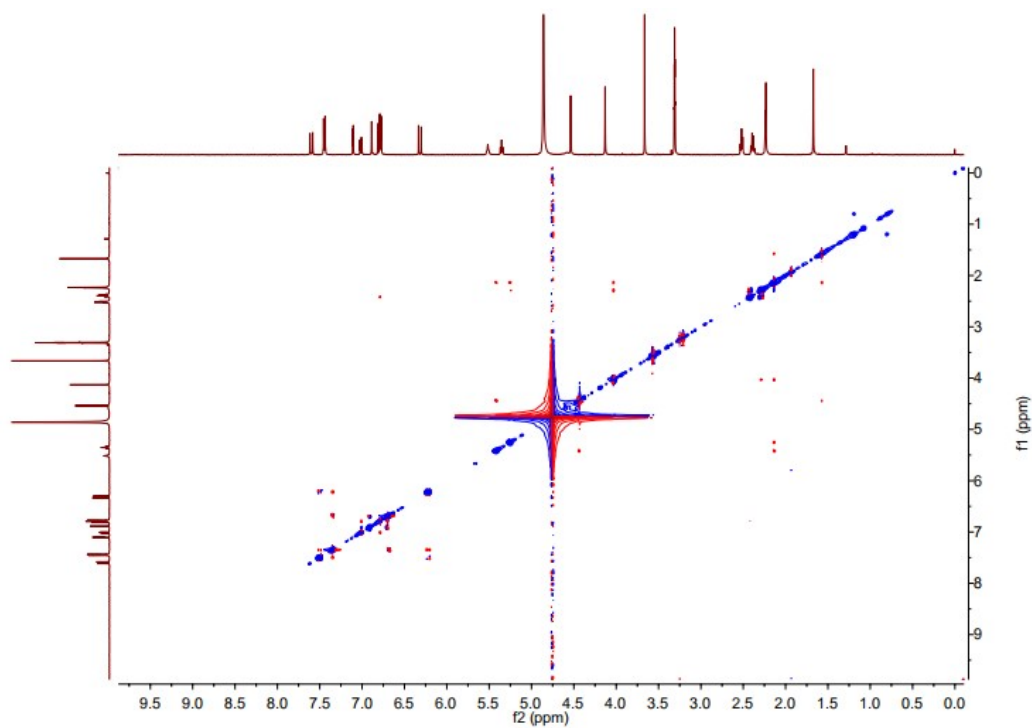

Figure S27. ROESY spectrum of **4** in methanol-*d*<sub>4</sub>.

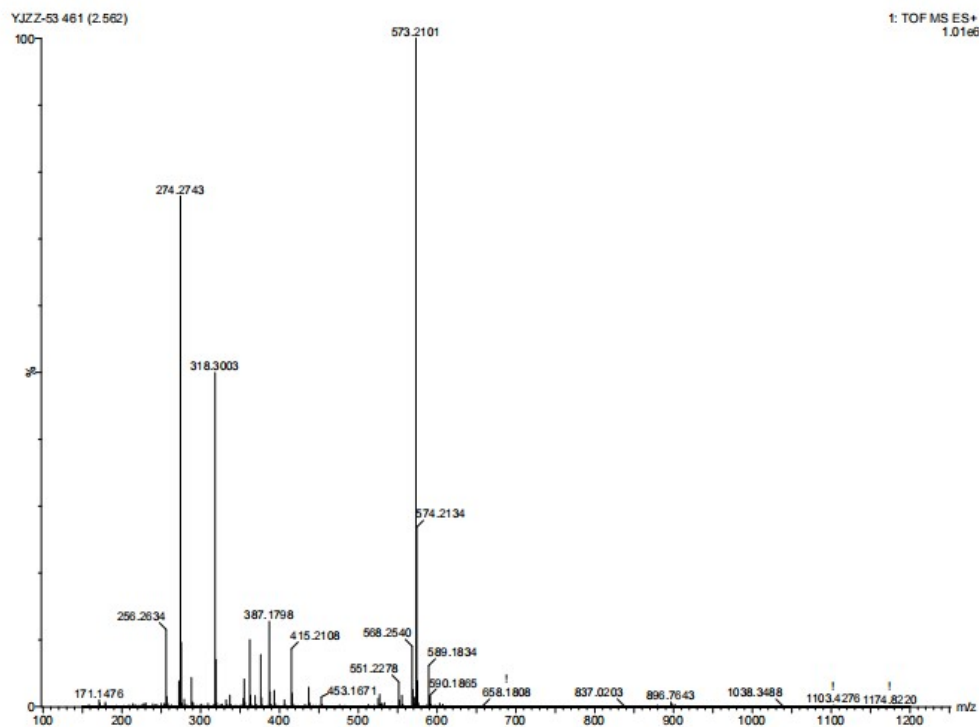



### Single Mass Analysis

Tolerance = 10.0 PPM / DBE: min = -1.5, max = 50.0

Element prediction: Off

Number of isotope peaks used for i-FIT = 3

Monoisotopic Mass, Even Electron Ions

83 formula(e) evaluated with 1 results within limits (up to 50 closest results for each mass)

Elements Used:

C: 31-31 H: 0-50 N: 0-4 O: 1-10 Na: 0-1

YJZZ-53 461 (2.562)

1: TOF MS ES+

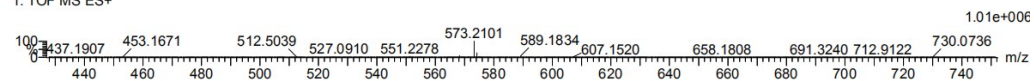

Minimum: 20.0 10.0 -1.5  
Maximum: 20.0 10.0 50.0

| Mass     | Calc. Mass | mDa | PPM | DBE  | i-FIT | Norm | Conf(%) | Formula       |
|----------|------------|-----|-----|------|-------|------|---------|---------------|
| 573.2101 | 573.2101   | 0.0 | 0.0 | 14.5 | 652.5 | n/a  | n/a     | C31 H34 O9 Na |

Figure S28. HRESIMS of 4.

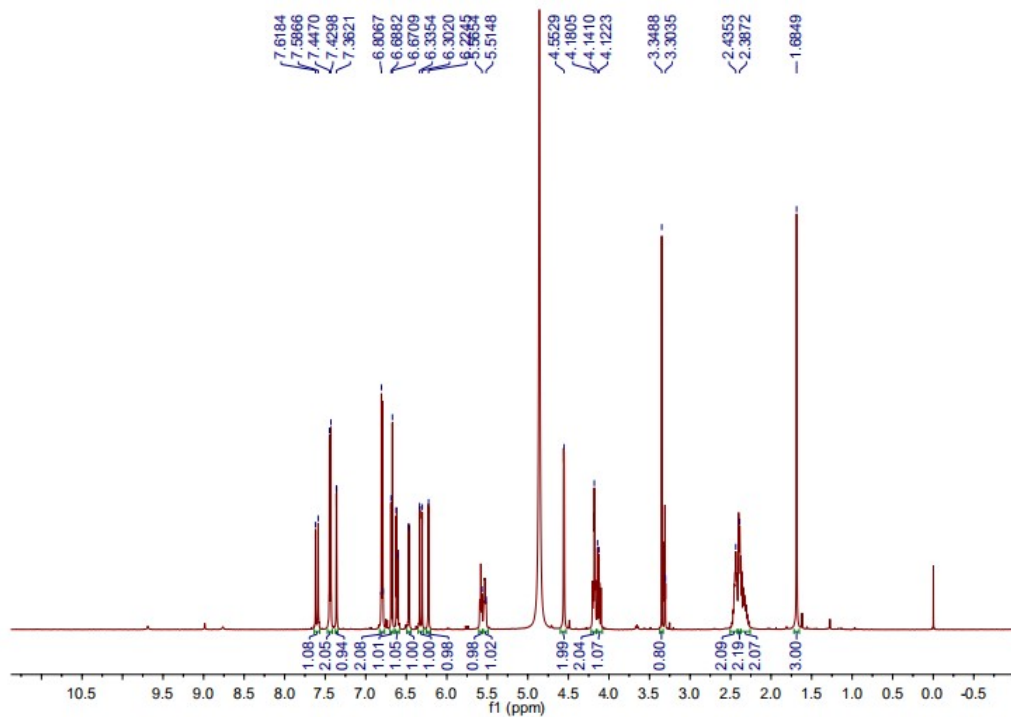

Figure S29. <sup>1</sup>H NMR spectrum of Fr.7.3.6.6.2.5.3 (the mixture of 5 and 6) in methanol-*d*<sub>4</sub>.

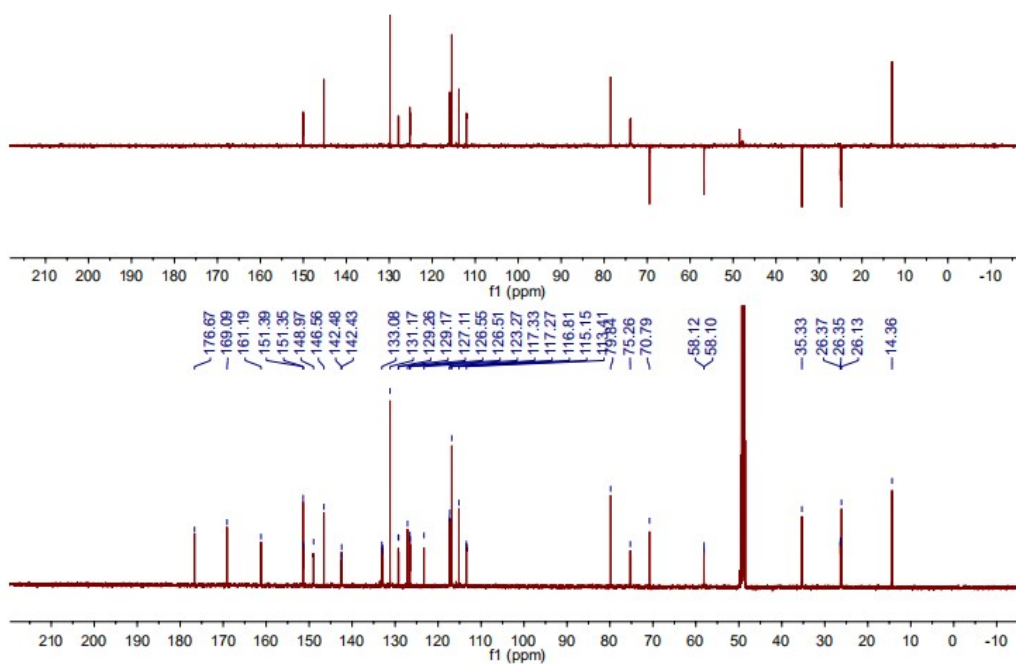

**Figure S30.**  $^{13}\text{C}$  NMR and DEPT spectra of **Fr.7.3.6.6.2.5.3** (the mixture of **5** and **6**) in methanol- $d_4$ .

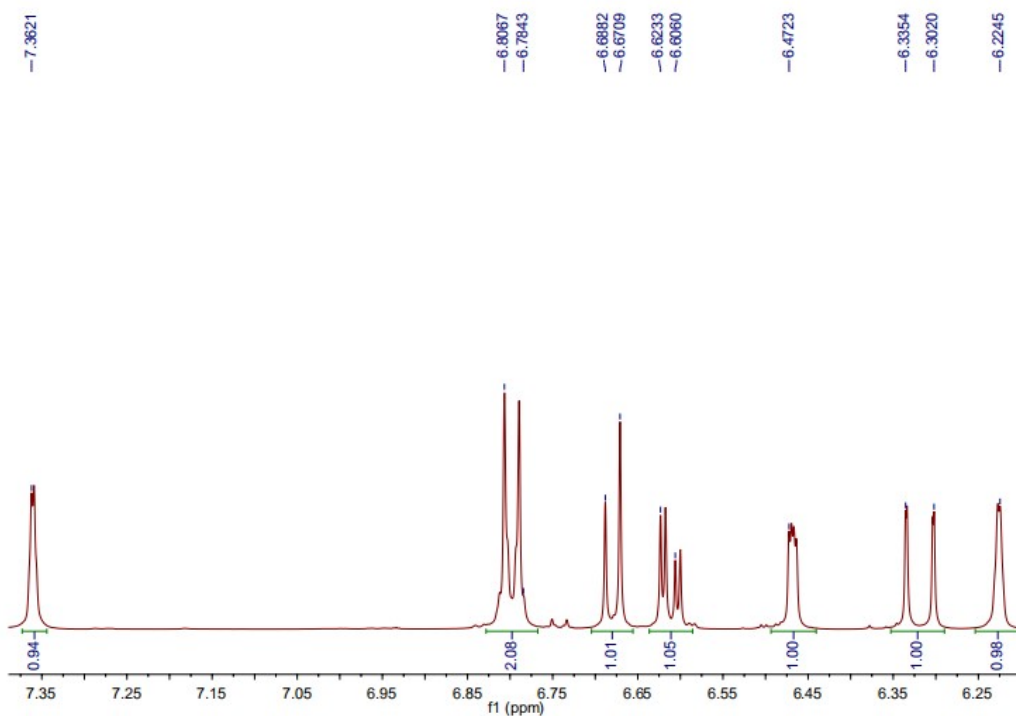

**Figure S31.** Enlarged  $^1\text{H}$  NMR spectrum of **Fr.7.3.6.6.2.5.3** (the mixture of **5** and **6**) in methanol- $d_4$  which indicates that compounds **5** and **6** are not enantiomers.

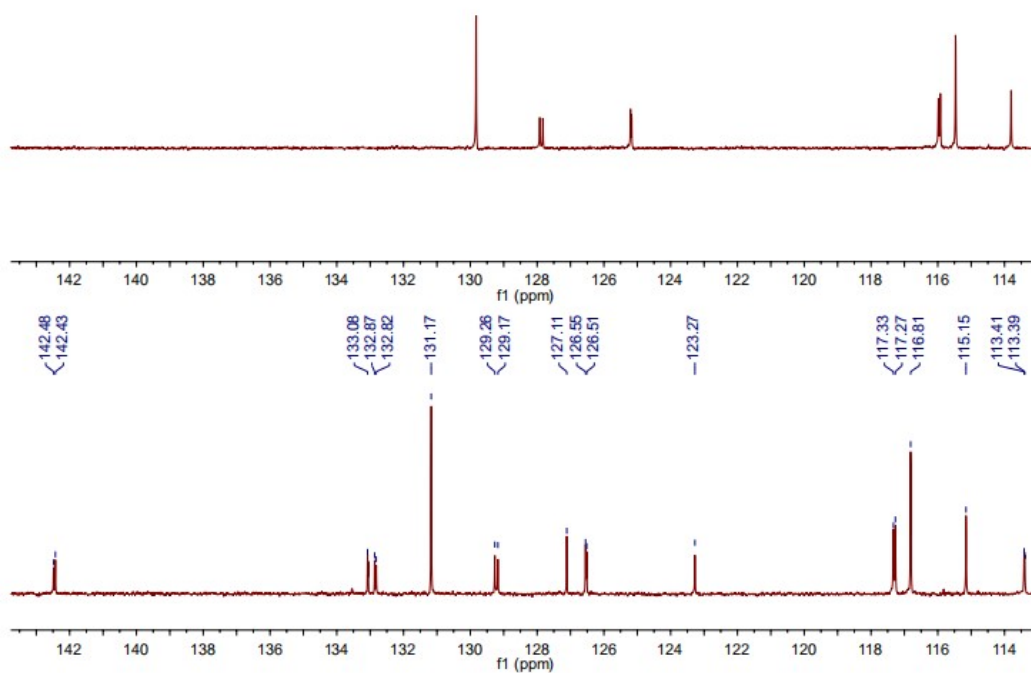

**Figure S32.** Enlarged  $^{13}\text{C}$  NMR and DEPT spectra of **Fr.7.3.6.6.2.5.3** (the mixture of **5** and **6**) in methanol- $d_4$  which indicates that compounds **5** and **6** are not enantiomers..

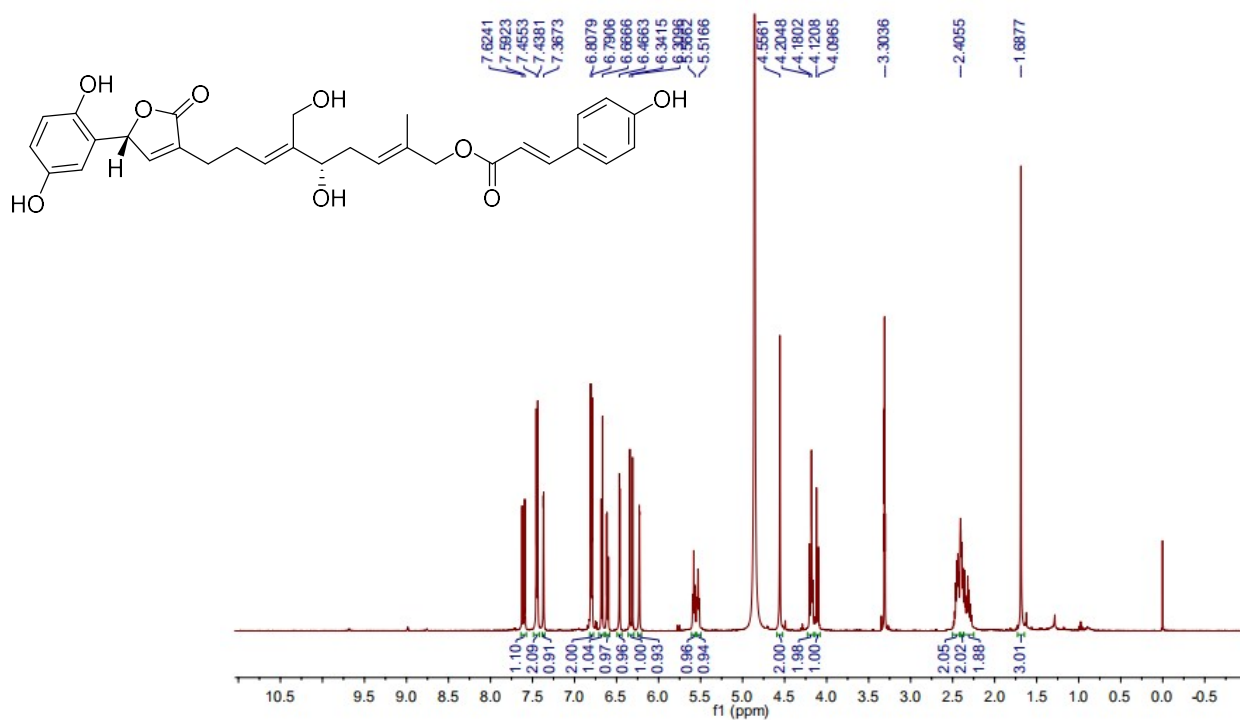

**Figure S33.**  $^1\text{H}$  NMR spectrum of **5** in methanol- $d_4$ .

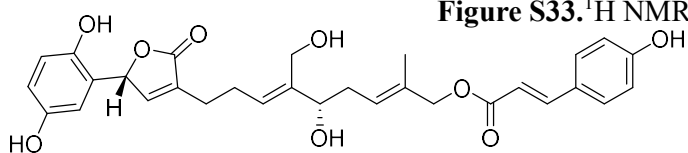

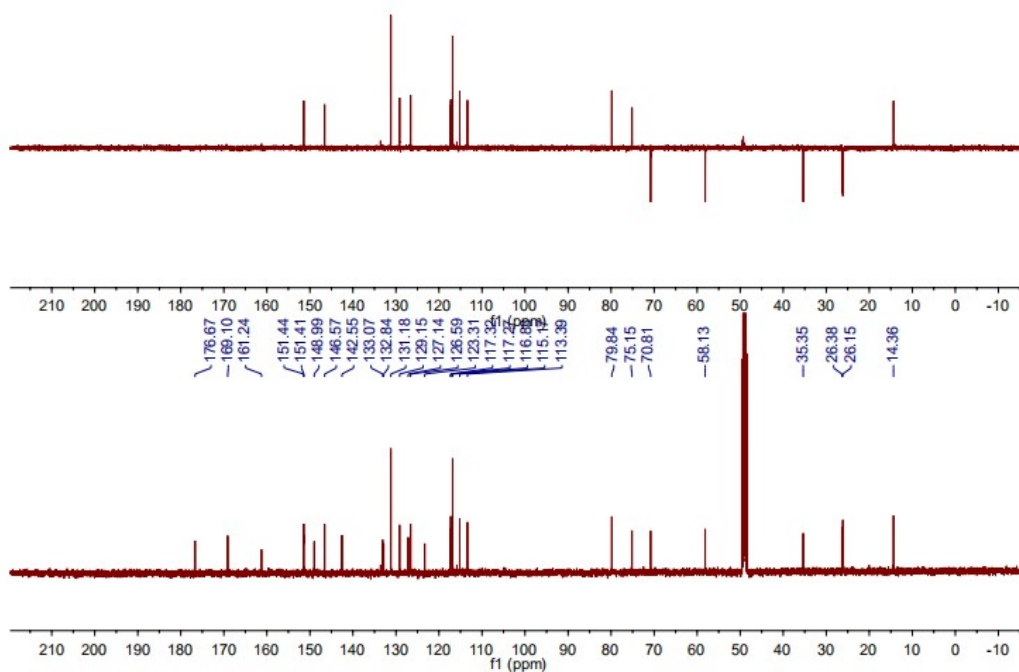

**Figure S34.**  $^{13}\text{C}$  NMR and DEPT spectra of **5** in methanol- $d_4$ .

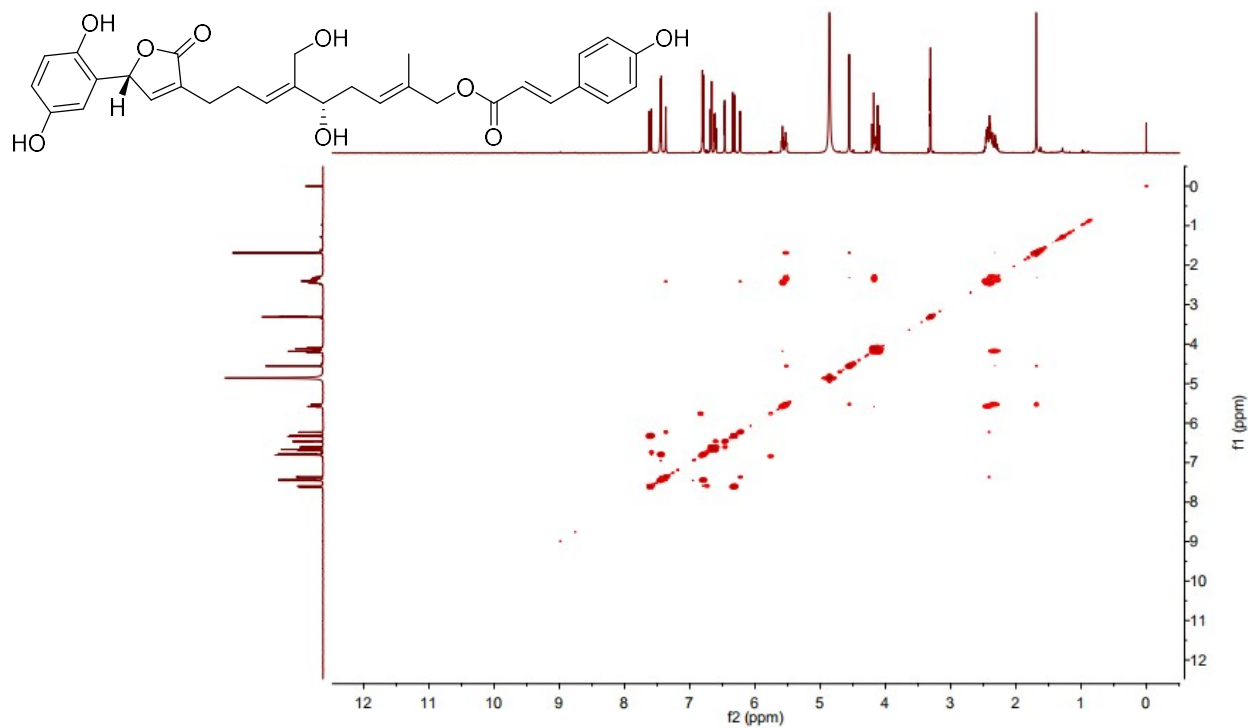

**Figure S35.**  $^1\text{H}$ - $^1\text{H}$  COSY spectrum of **5** in methanol- $d_4$ .

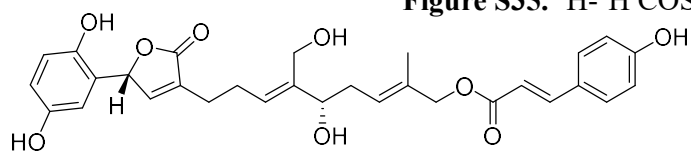

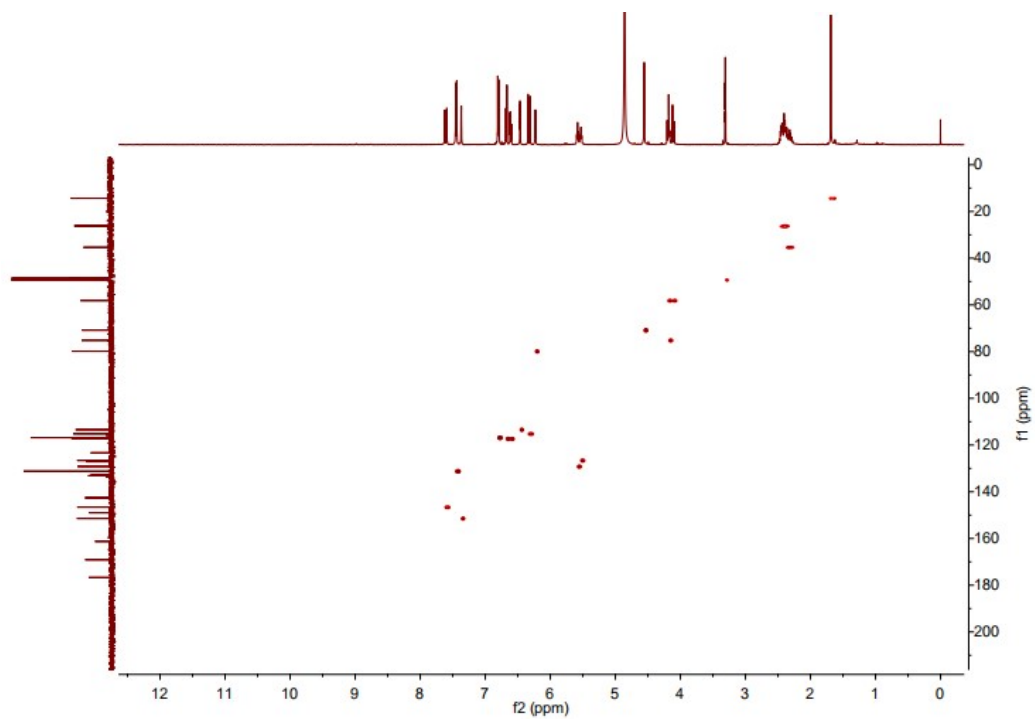

**Figure S36.** HSQC spectrum of **5** in methanol-*d*<sub>4</sub>.

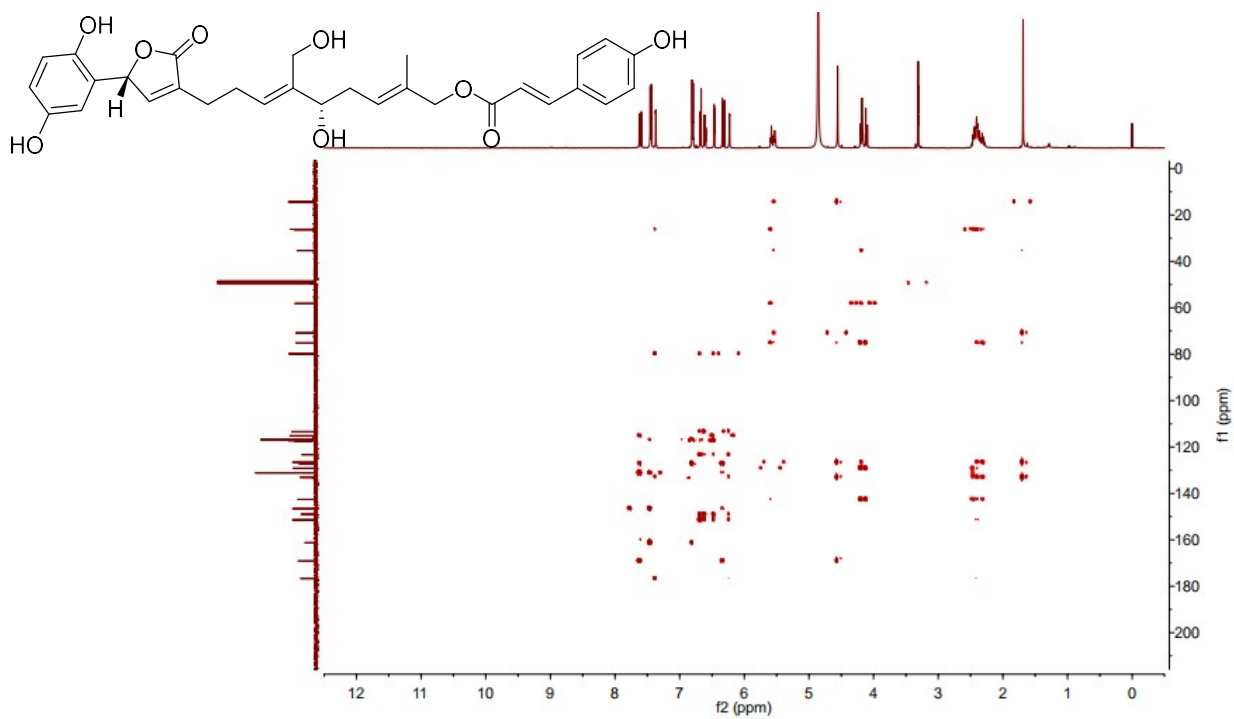

**Figure S37.** HMBC spectrum of **5** in methanol-*d*<sub>4</sub>.

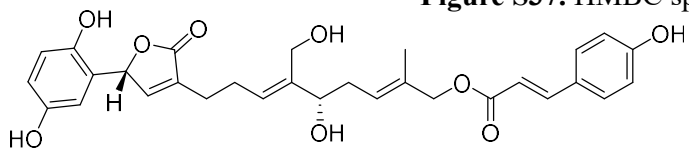

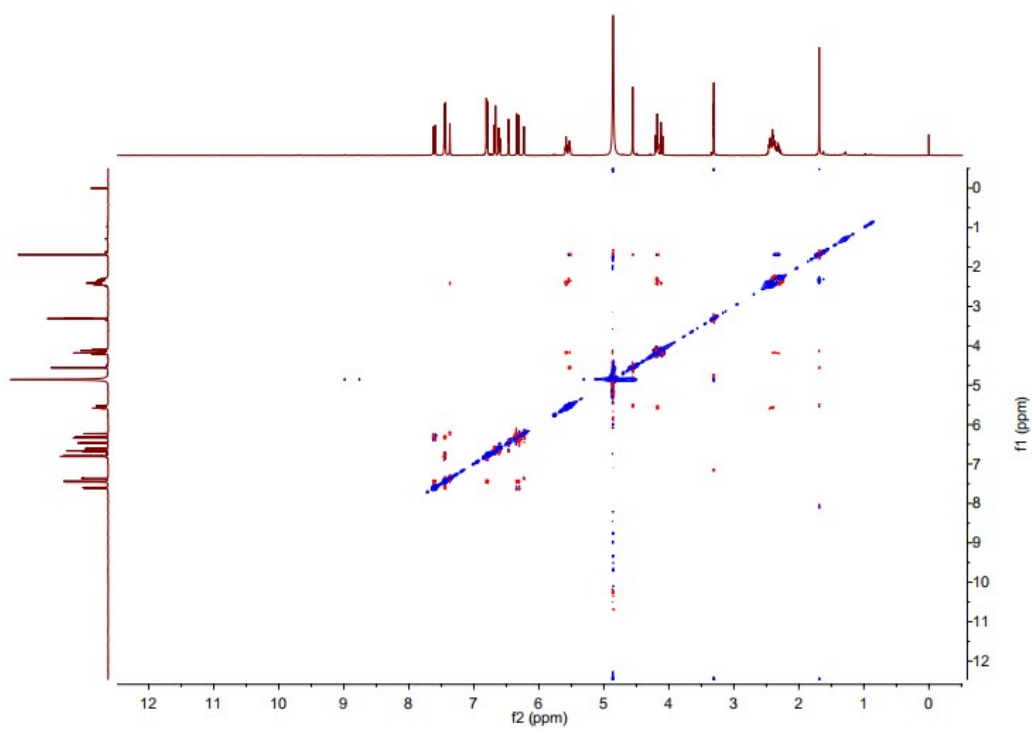

**Figure S38.** ROESY spectrum of **5** in methanol-*d*<sub>4</sub>.

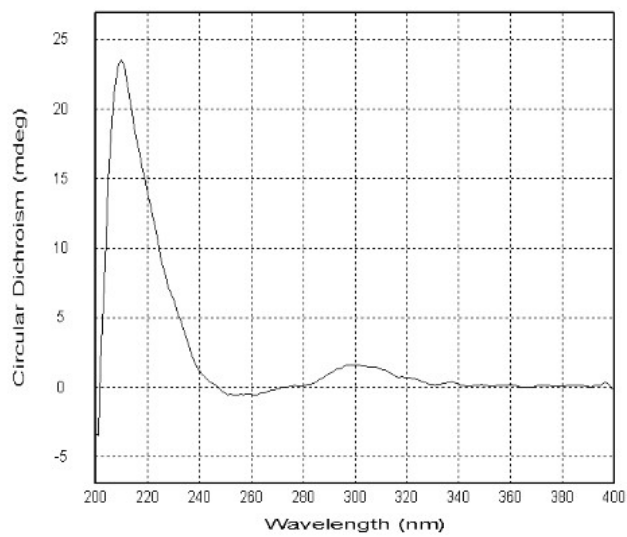

**Figure S39.** ECD spectrum of **5**.

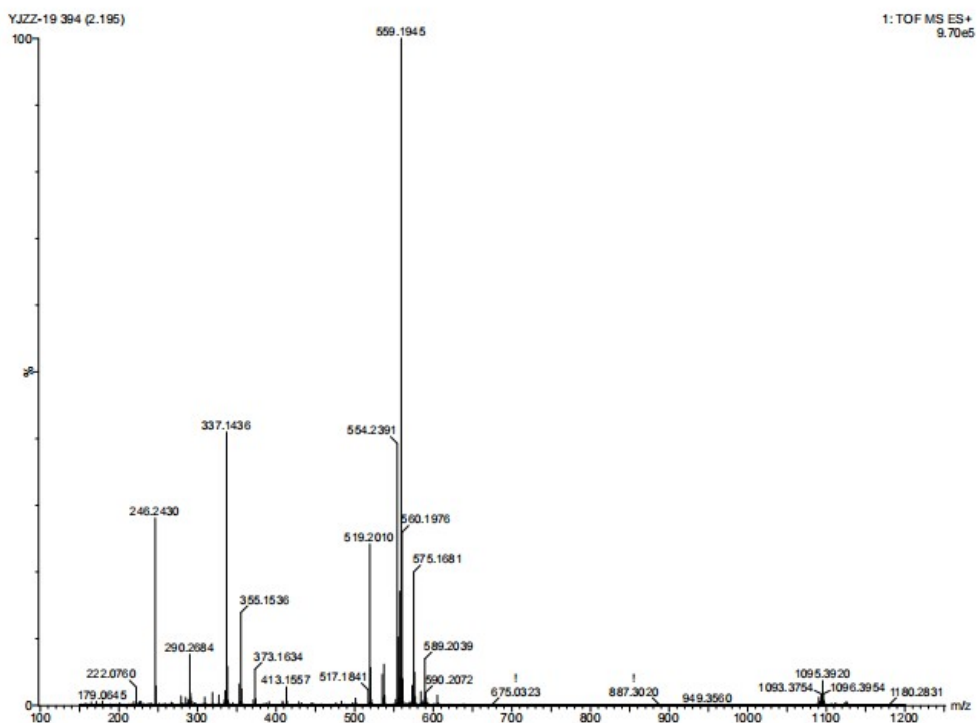

**Single Mass Analysis**

Tolerance = 10.0 PPM / DBE: min = -1.5, max = 50.0

Element prediction: Off

Number of isotope peaks used for i-FIT = 3

Monoisotopic Mass, Even Electron Ions

84 formula(e) evaluated with 1 results within limits (up to 50 closest results for each mass)

Elements Used:

C: 30-30 H: 0-50 N: 0-4 O: 1-10 Na: 0-1

YJZZ-19 394 (2.195)

1: TOF MS ES+

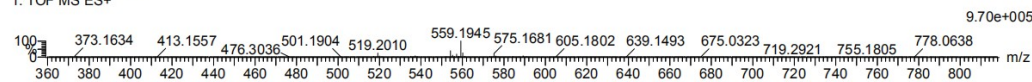

Minimum: -1.5

Maximum: 20.0 10.0 50.0

| Mass     | Calc. Mass | mDa | PPM | DBE  | i-FIT | Norm | Conf(%) | Formula       |
|----------|------------|-----|-----|------|-------|------|---------|---------------|
| 559.1945 | 559.1944   | 0.1 | 0.2 | 14.5 | 604.0 | n/a  | n/a     | C30 H32 O9 Na |

**Figure S40. HRESIMS of 5.**

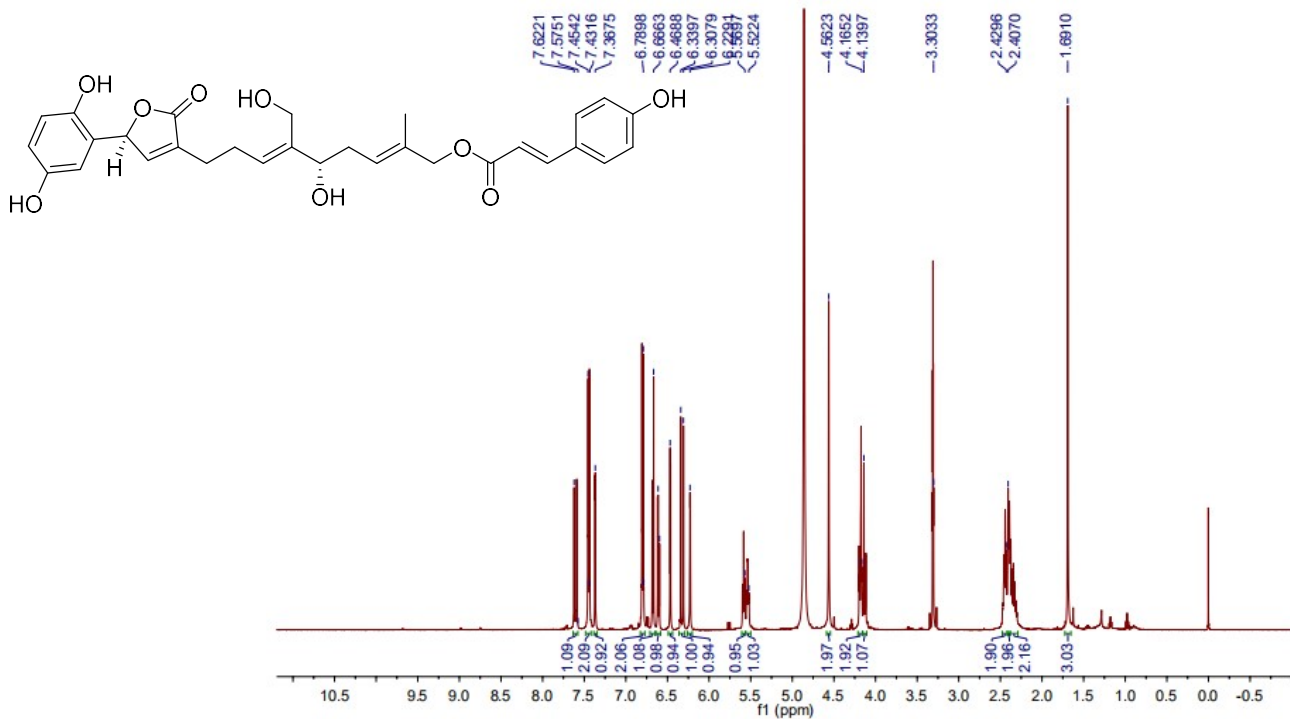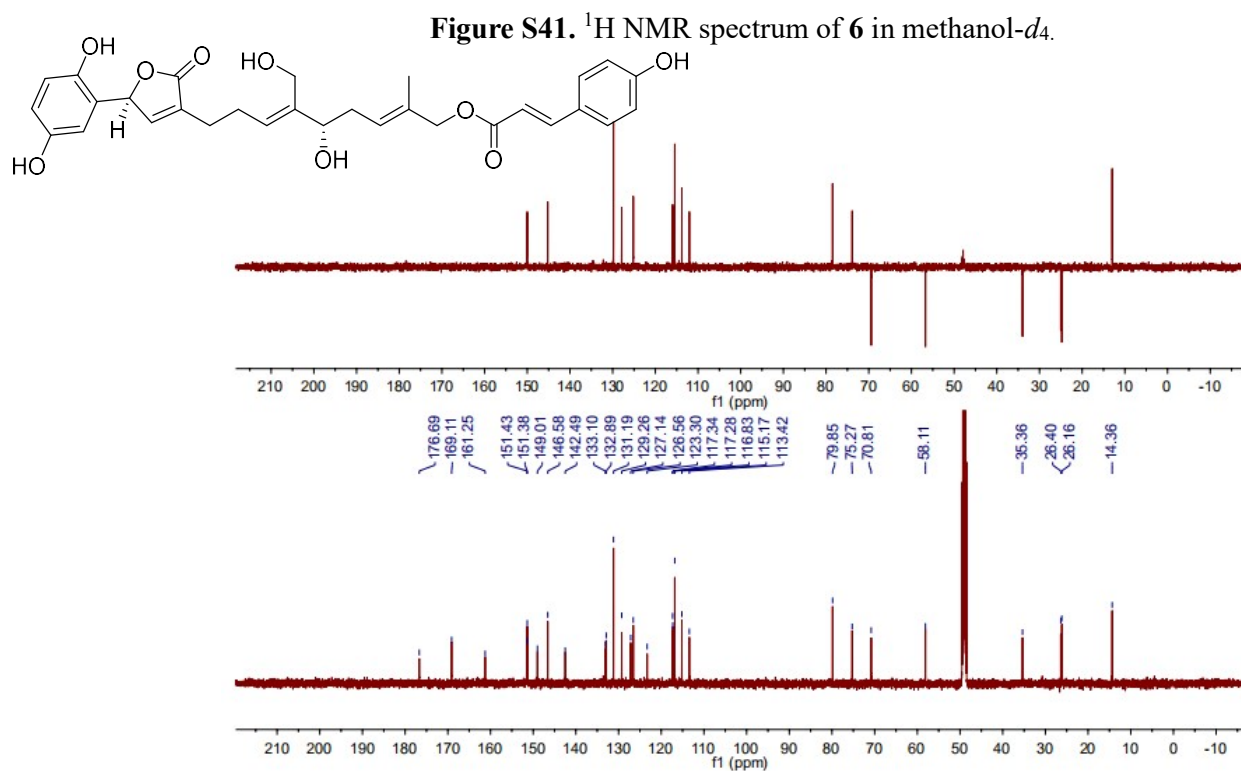



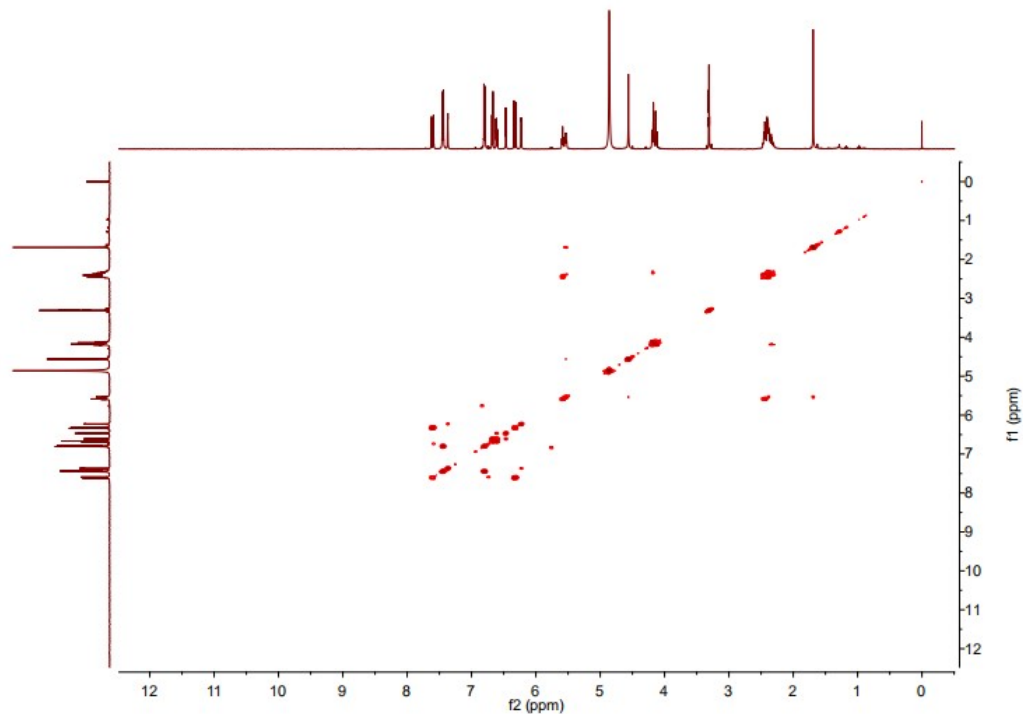

**Figure S43.**  $^1\text{H}$ - $^1\text{H}$  COSY spectrum of **6** in methanol- $d_4$ .

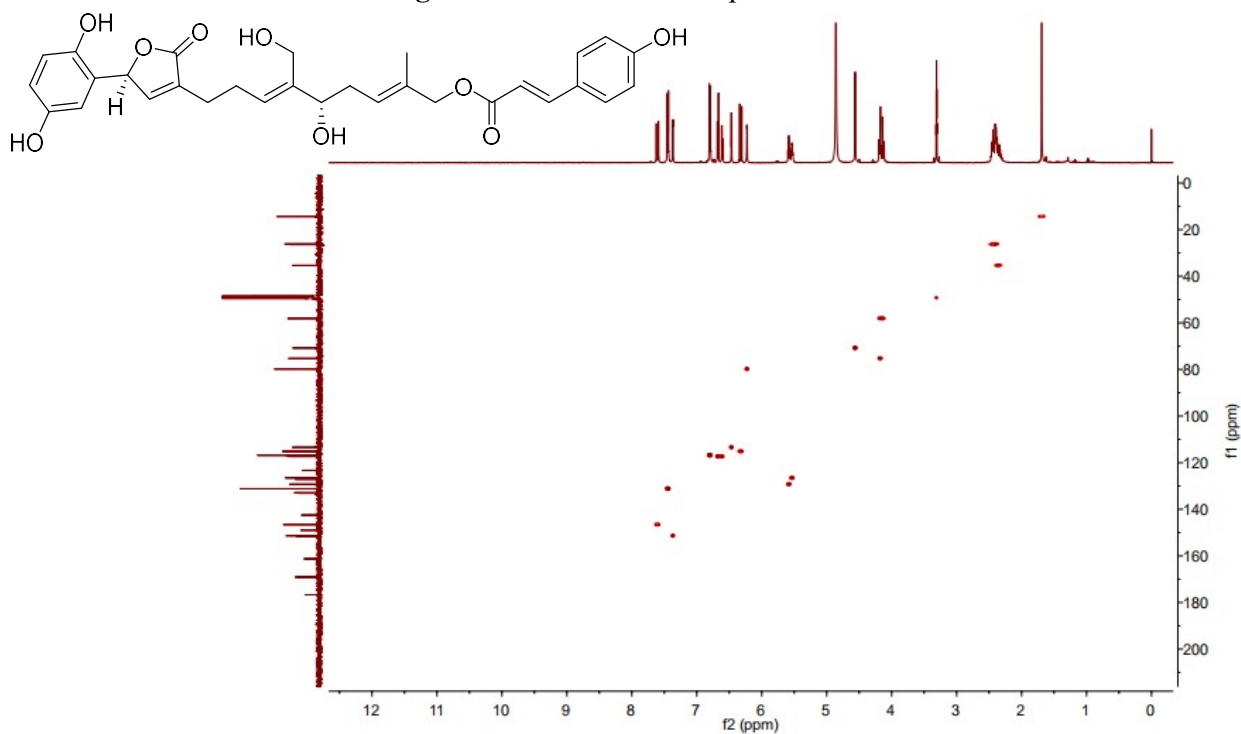

**Figure S44.** HSQC spectrum of **6** in methanol- $d_4$ .

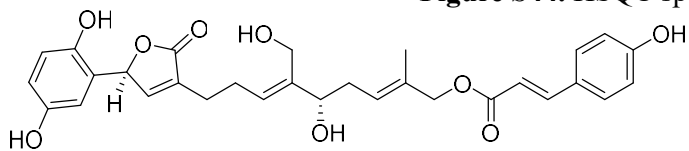

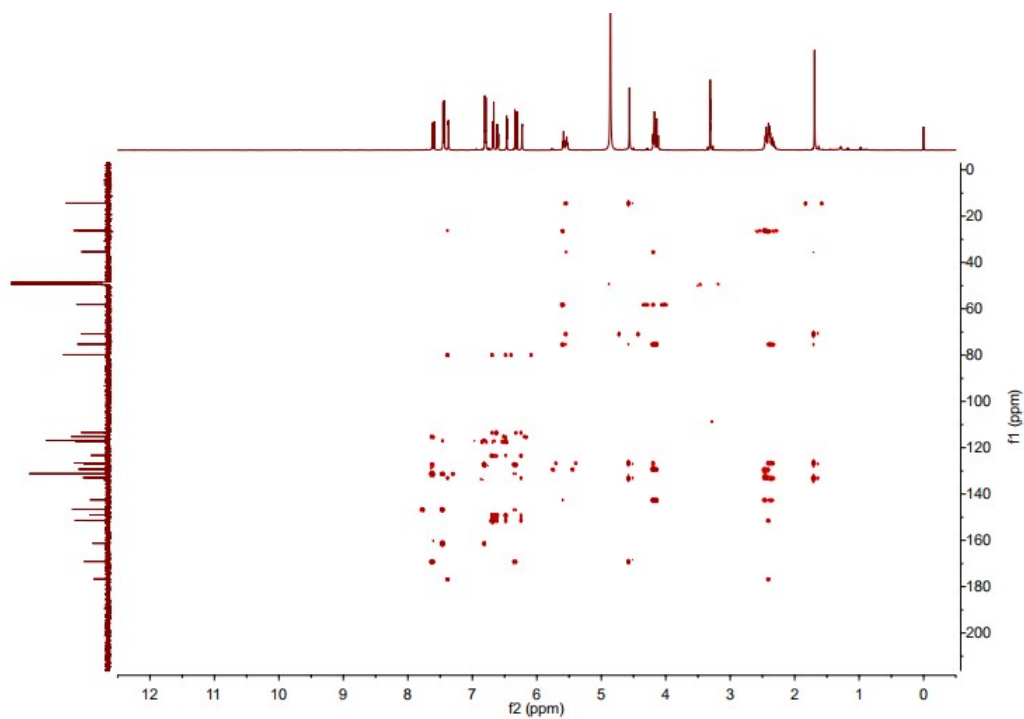

**Figure S45.** HMBC spectrum of **6** in methanol-*d*<sub>4</sub>.

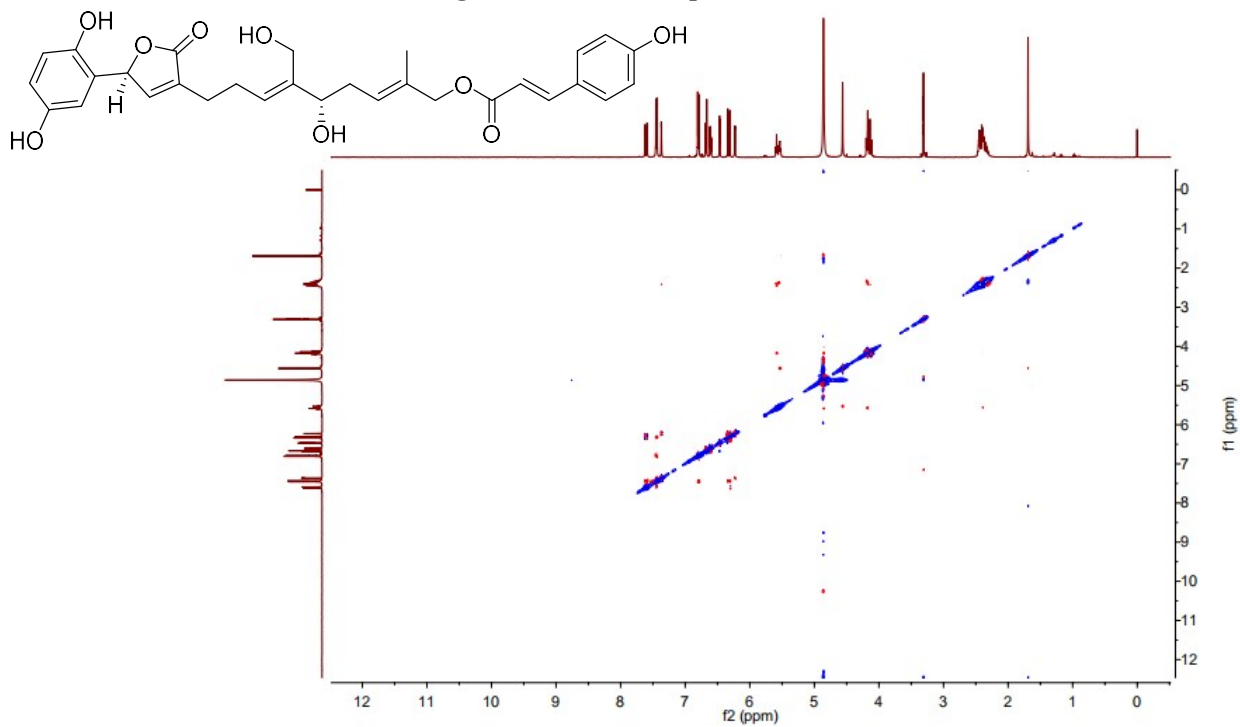

**Figure S46.** ROESY spectrum of **6** in methanol-*d*<sub>4</sub>.

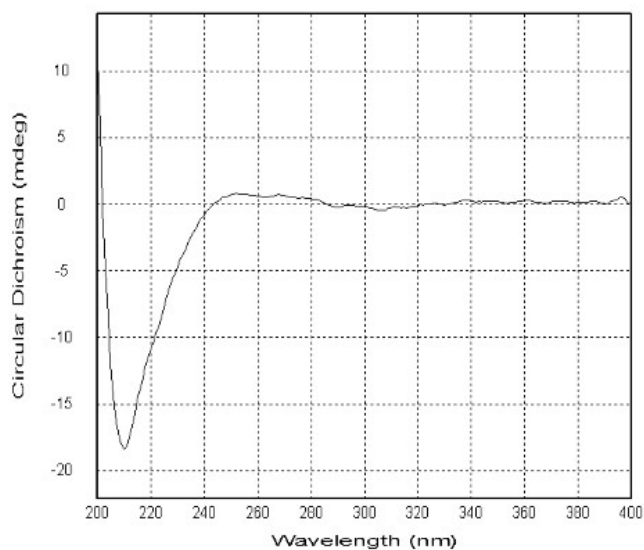

**Figure S47. ECD spectrum of 6.**

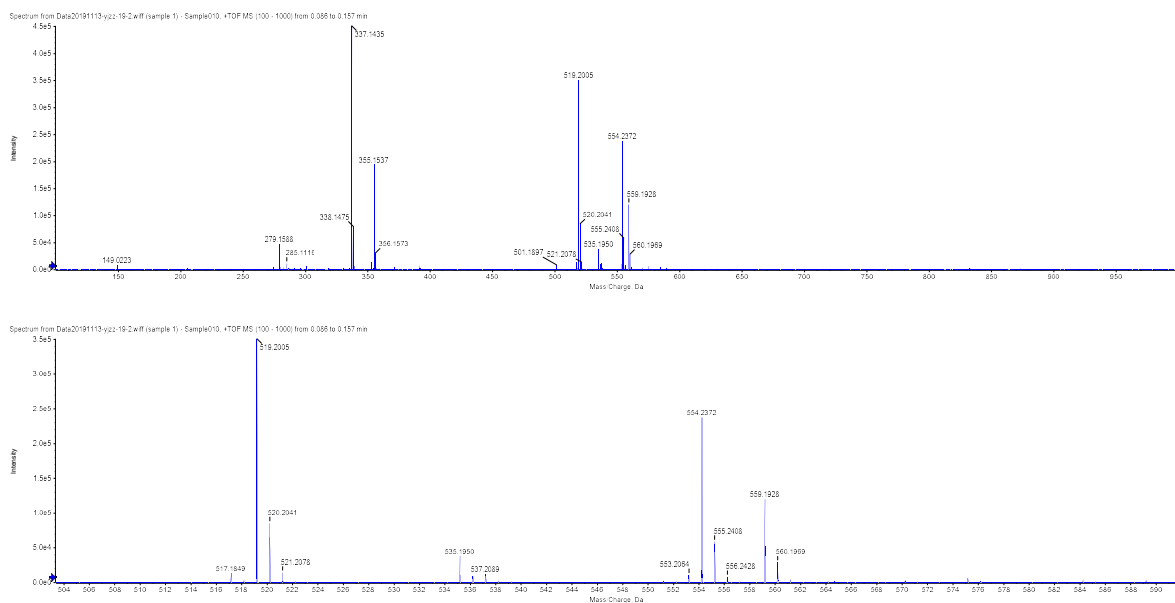

$[M+NH_4]^+$  m/z 554.2371

| Hit | Formula                                                        | m/z      | RDB  | ppm  |
|-----|----------------------------------------------------------------|----------|------|------|
| 1   | C <sub>30</sub> H <sub>32</sub> O <sub>9</sub> NH <sub>4</sub> | 554.2385 | 14.0 | -2.3 |

Elements from ~ to C<sub>30</sub>H<sub>32</sub>O<sub>9</sub>

Mass tolerance 5 ppm

**Figure S48. HRESIMS of 6.**

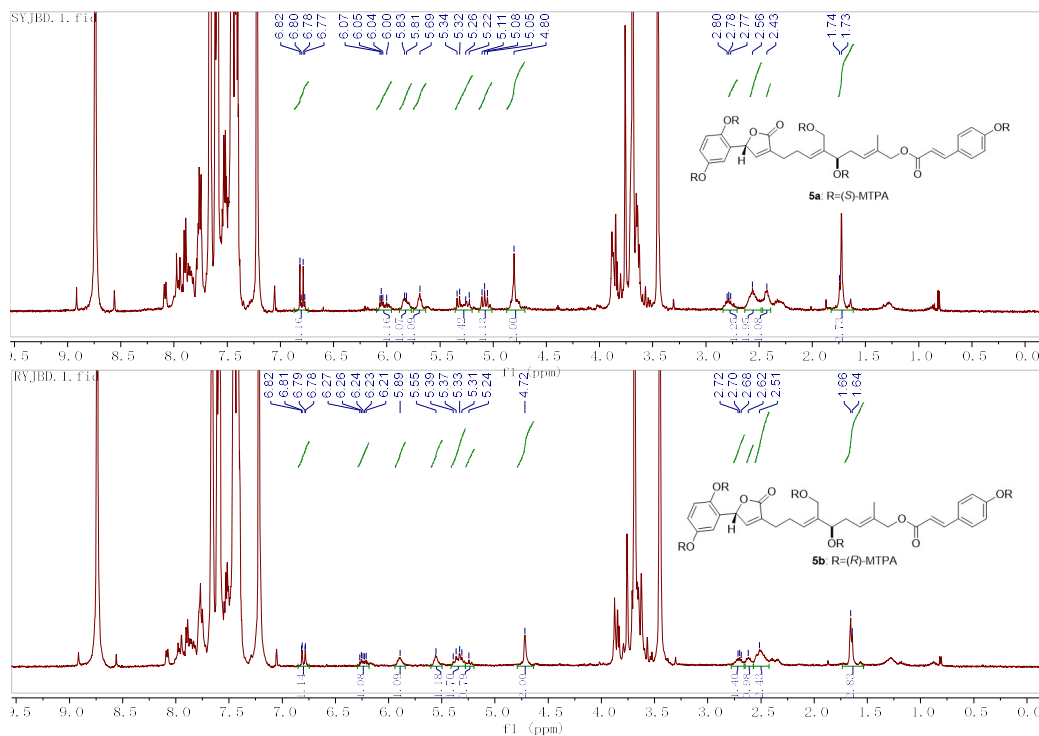

Figure S49.  $^1\text{H}$  NMR spectrum of **5a** and **5b** in  $\text{pyridine-}d_5$ .

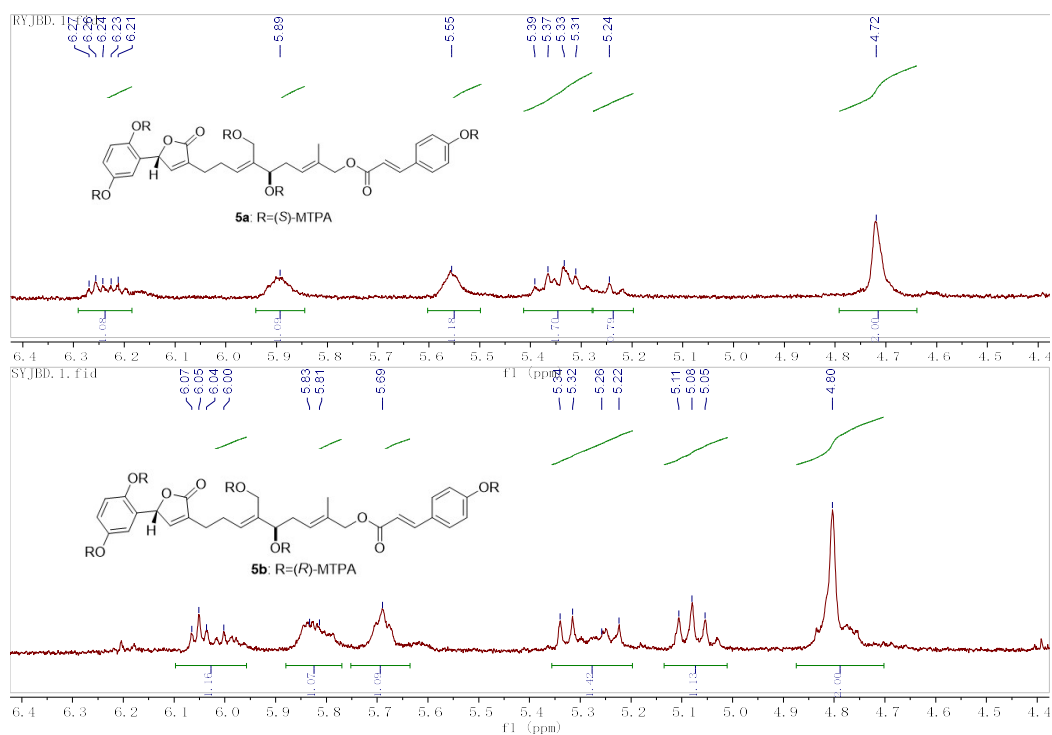

Figure S50. Enlarged  $^1\text{H}$  NMR spectrum of **5a** and **5b** in  $\text{pyridine-}d_5$ .

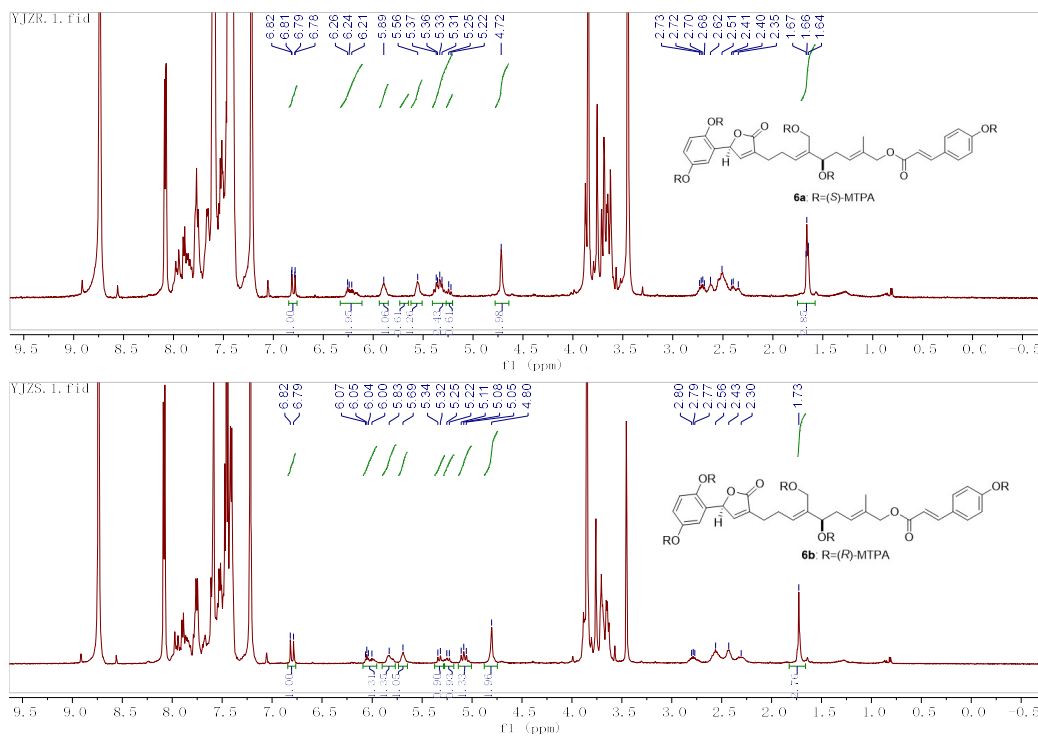

Figure S51.  $^1\text{H}$  NMR spectrum of **6a** and **6b** in  $\text{pyridine-d}_5$ .

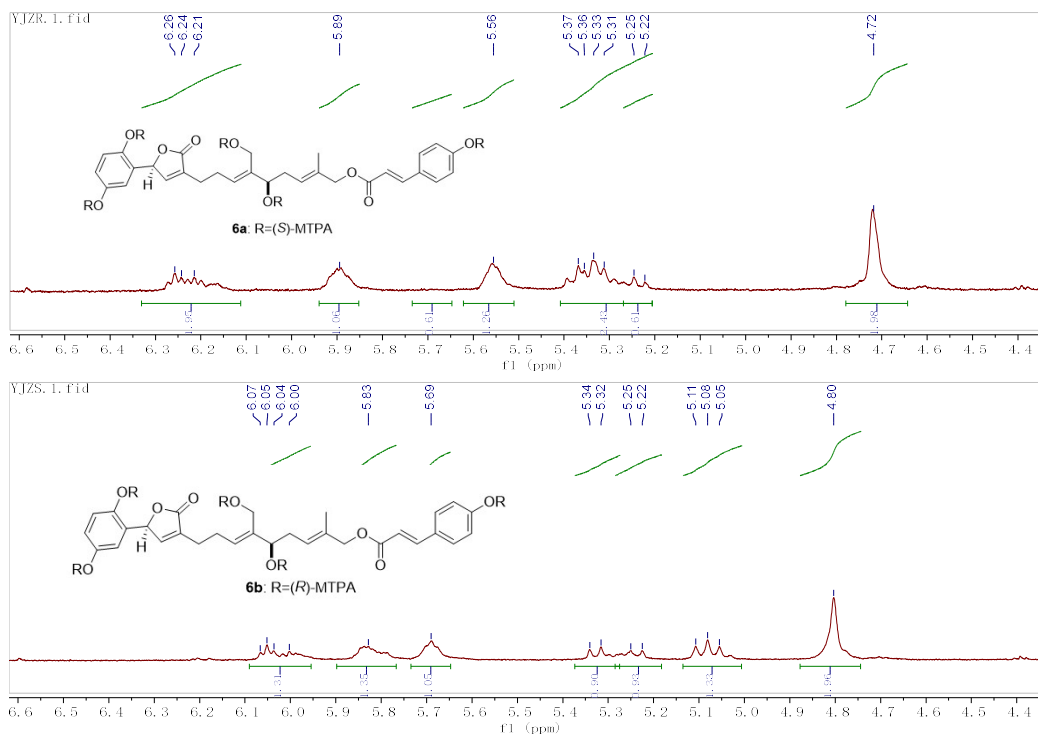

Figure S52. Enlarged  $^1\text{H}$  NMR spectrum of **6a** and **6b** in  $\text{pyridine-d}_5$ .

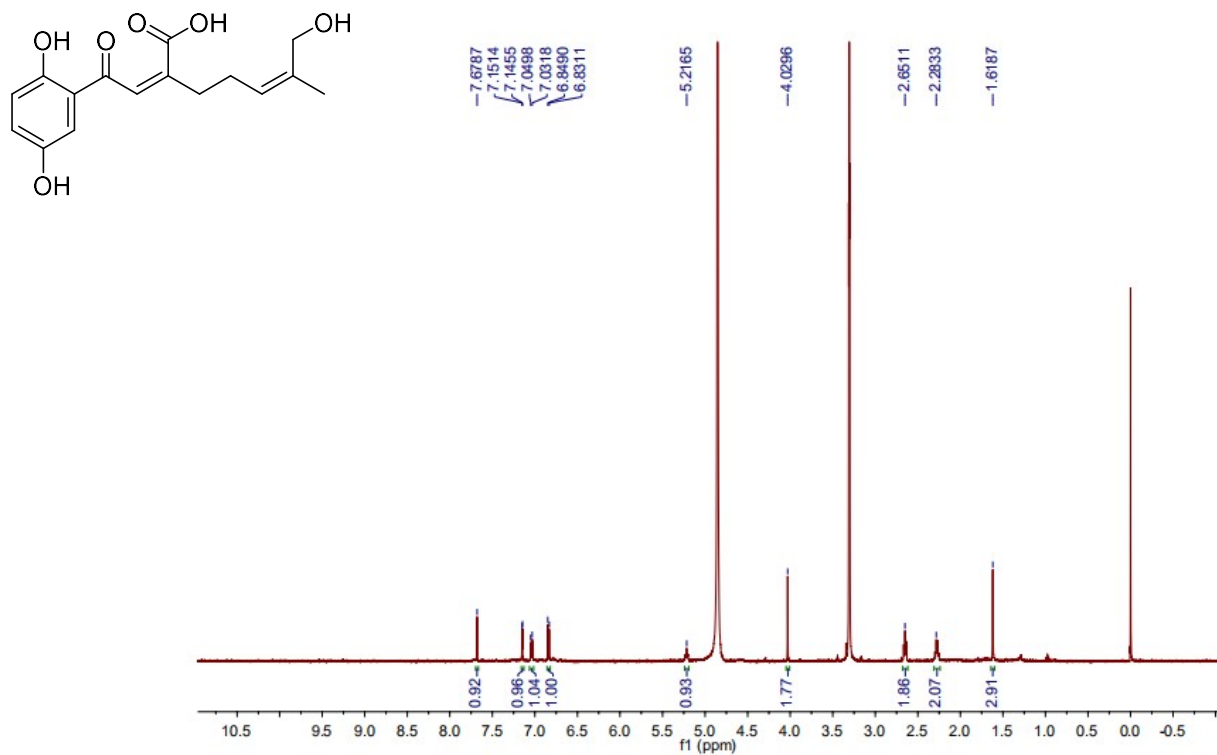

Figure S53. <sup>1</sup>H NMR spectrum of 7 in methanol-*d*<sub>4</sub>.

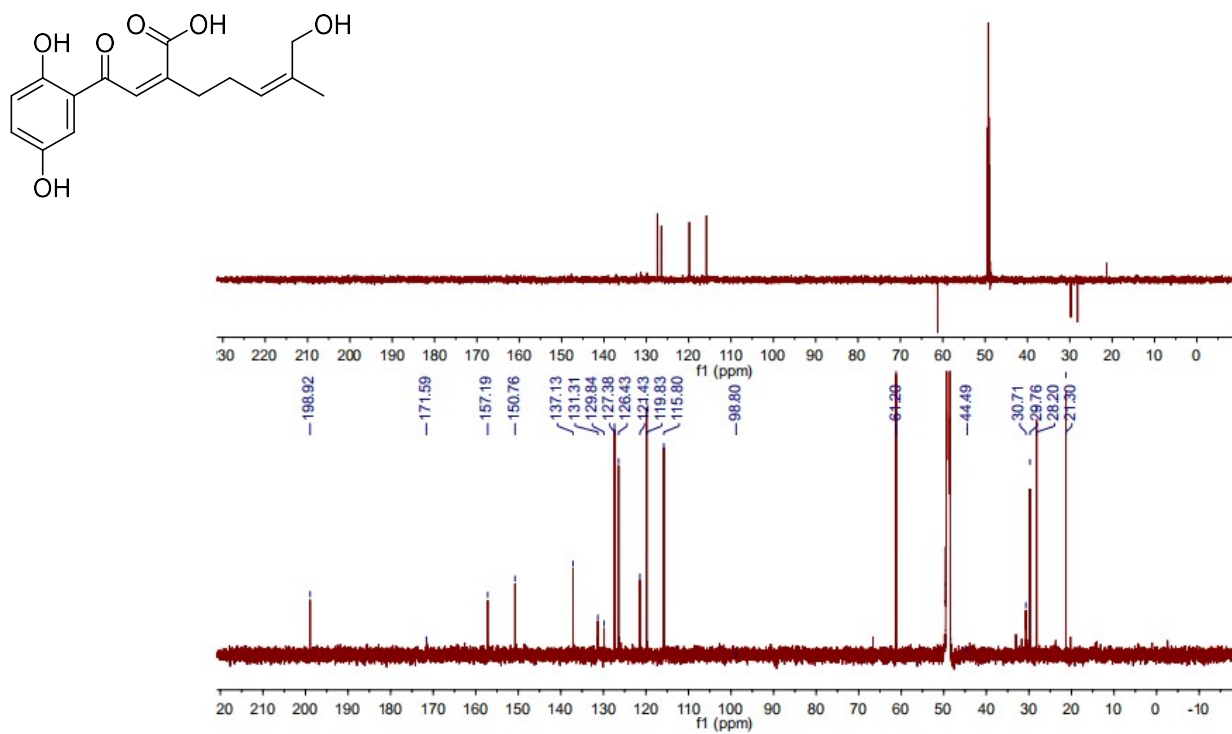

Figure S54. <sup>13</sup>C NMR and DEPT spectra of 7 in methanol-*d*<sub>4</sub>.

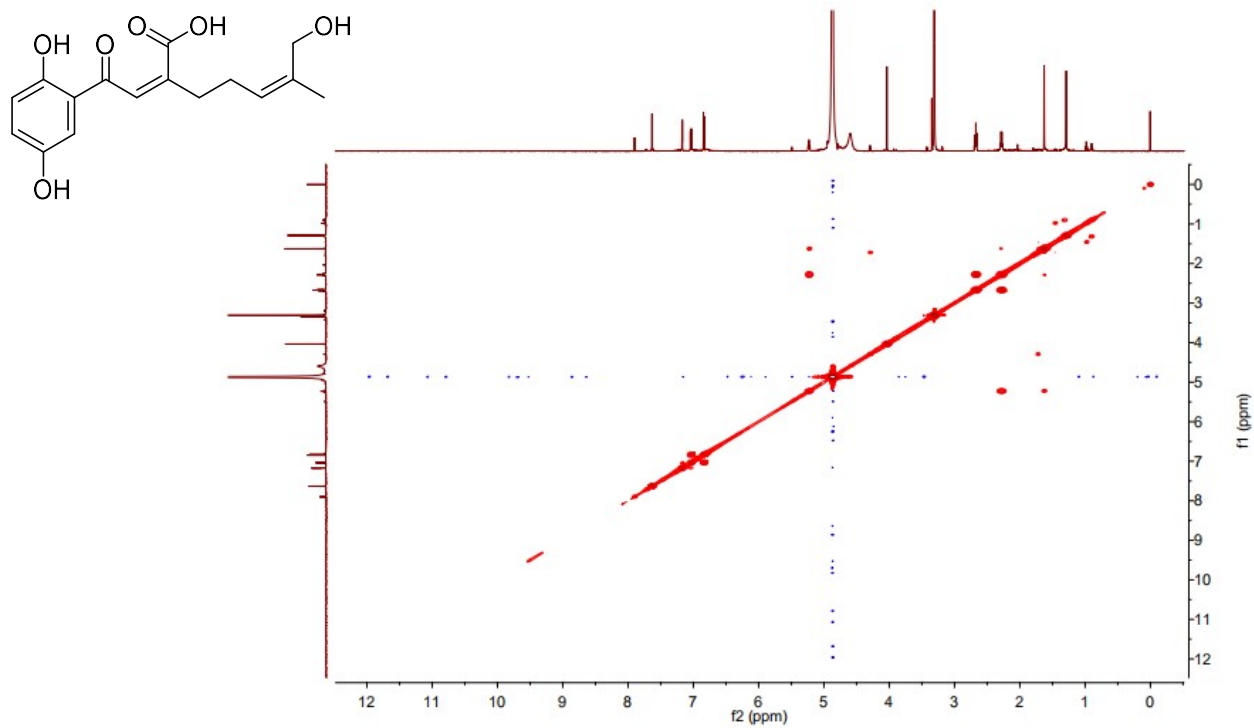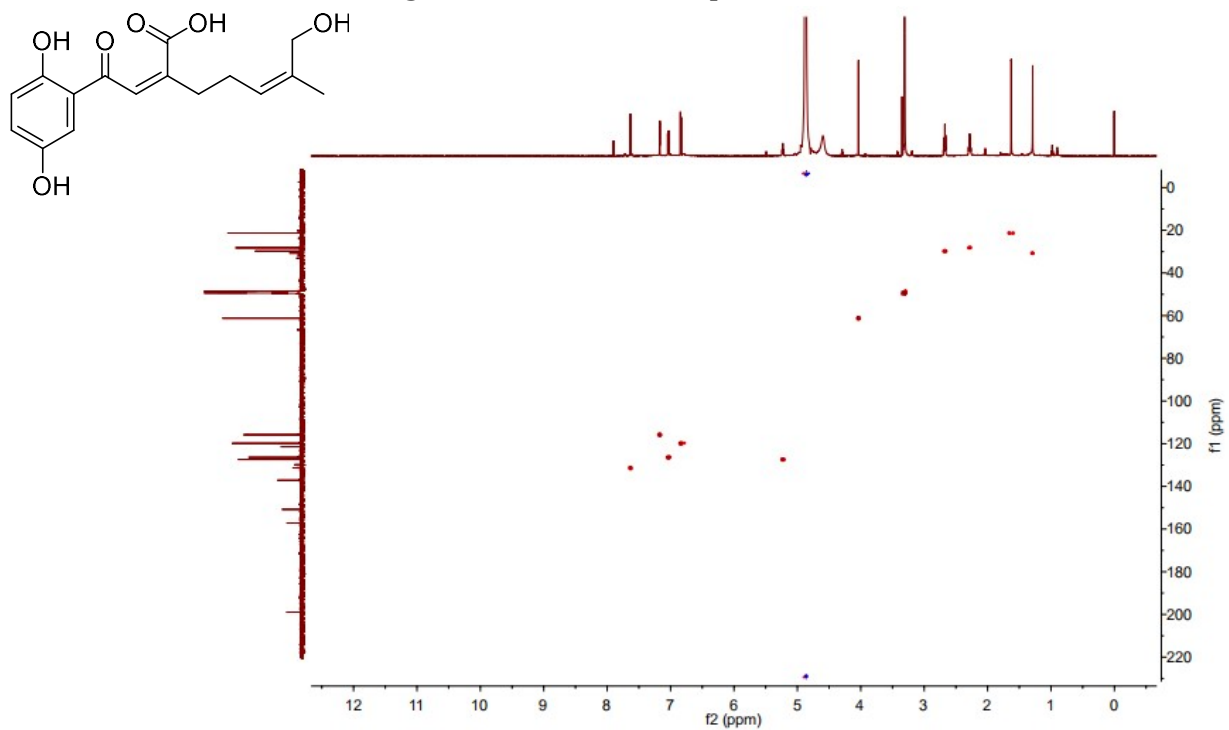

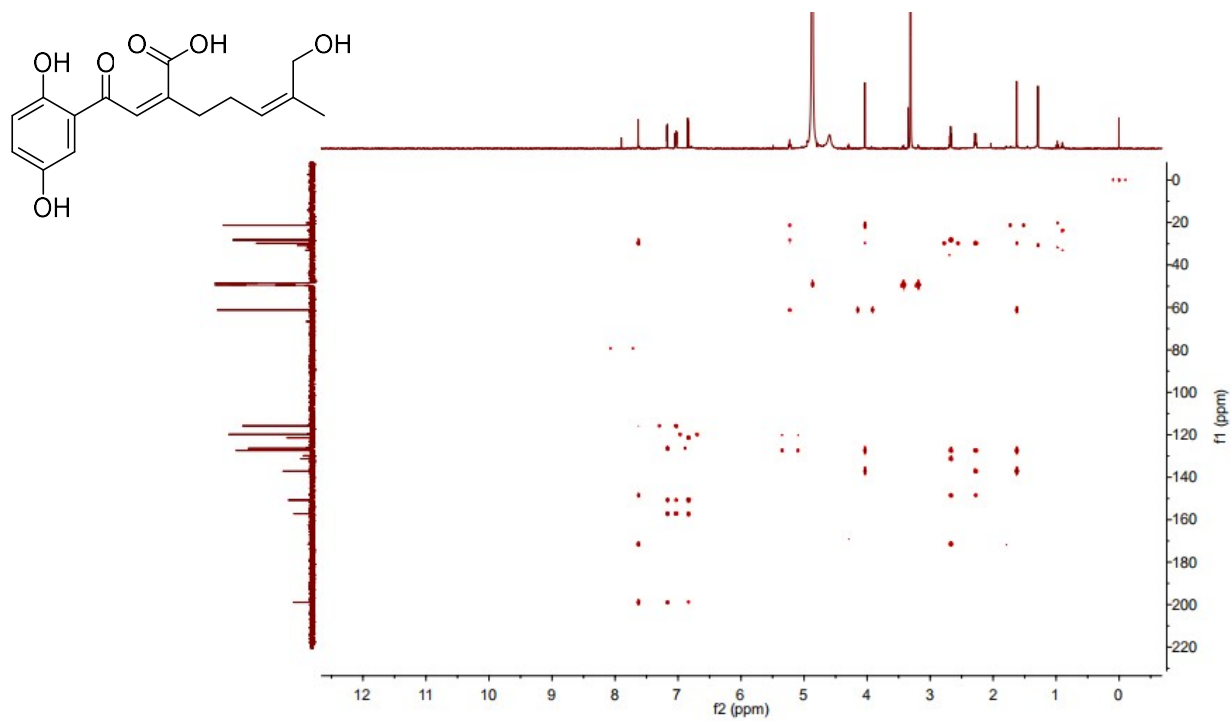

**Figure 57.** HMBC spectrum of **7** in methanol-*d*<sub>4</sub>.

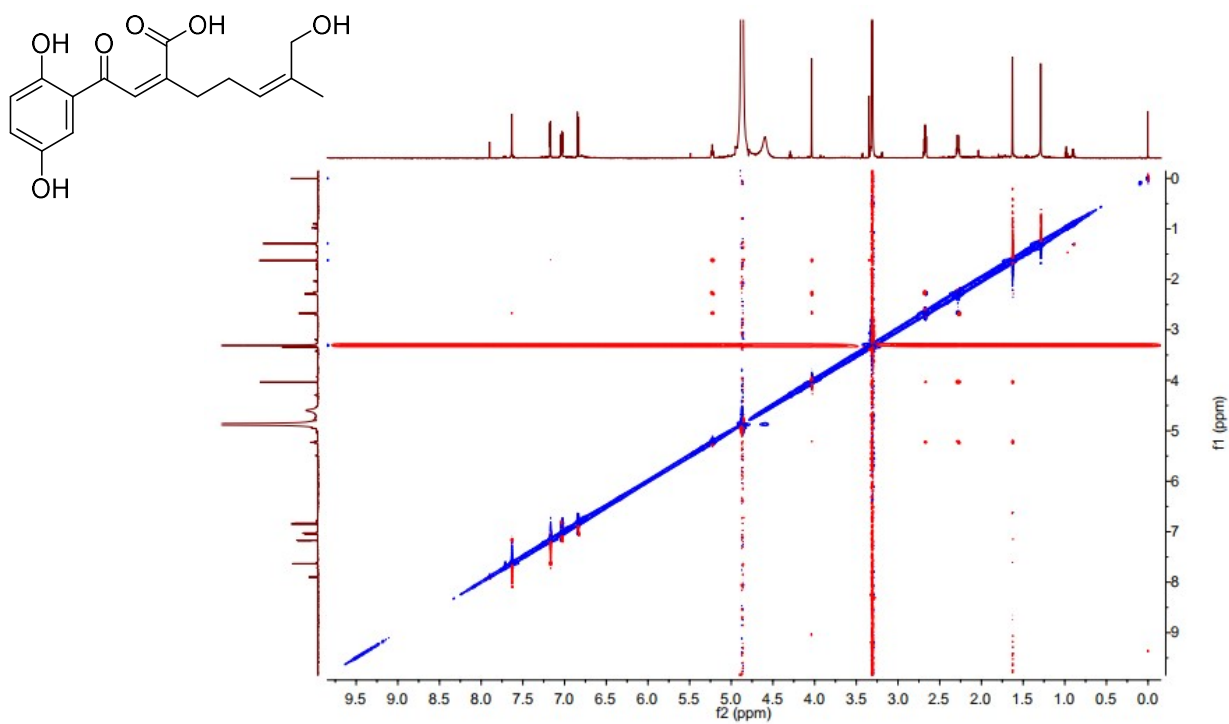

**Figure S58.** ROESY spectrum of **7** in methanol-*d*<sub>4</sub>.



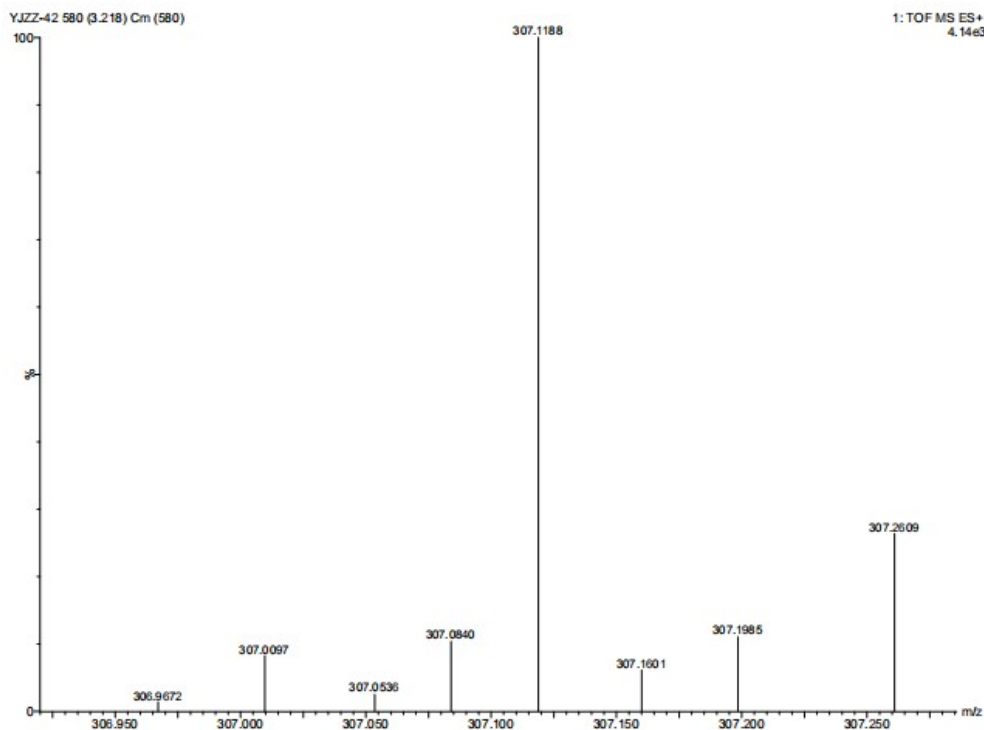

#### Single Mass Analysis

Tolerance = 10.0 PPM / DBE: min = -1.5, max = 50.0

Element prediction: Off

Number of isotope peaks used for i-FIT = 3

Monoisotopic Mass, Even Electron Ions

97 formula(e) evaluated with 1 results within limits (up to 50 closest results for each mass)

Elements Used:

C: 16-16 H: 0-50 N: 0-4 O: 1-10 Na: 0-1

YJZZ-42 580 (3.218) Cm (580)

1: TOF MS ES+

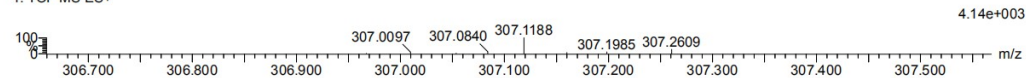

Minimum: -1.5  
Maximum: 50.0

| Mass     | Calc. Mass | mDa | PPM | DBE | i-FIT | Norm | Conf(%) | Formula    |
|----------|------------|-----|-----|-----|-------|------|---------|------------|
| 307.1188 | 307.1182   | 0.6 | 2.0 | 7.5 | 64.4  | n/a  | n/a     | C16 H19 O6 |

**Figure S59.** HRESIMS of **7**.

#### ECD calculation for compound **1**

Conformation search using molecular mechanics calculations was performed in CONFLEX version 7.0 with MMFF force field with an energy window for acceptable conformers (ewindow) of 5 kcal/mol above the ground state, a maximum number of conformations per molecule (maxconfs) of 100, and an RMSD cutoff (rmsd) of 0.5 Å.

Then the predominant conformers were optimized at B3LYP/6-311+g(2d,p) level in Gaussian 09 <sup>[1]</sup>. The optimized conformation geometries and thermodynamic parameters of all selected conformations were provided. The optimized conformers of **1** were used for the ECD calculation, which were performed with Gaussian 09 (B3LYP/6-311+g(2d,p)). The solvent effects were taken into account by the polarizable-conductor calculation model (PCM, methanol as the solvent). Percentages for each conformation are shown in Table S1.

### Selected conformation of **1** and their percentage

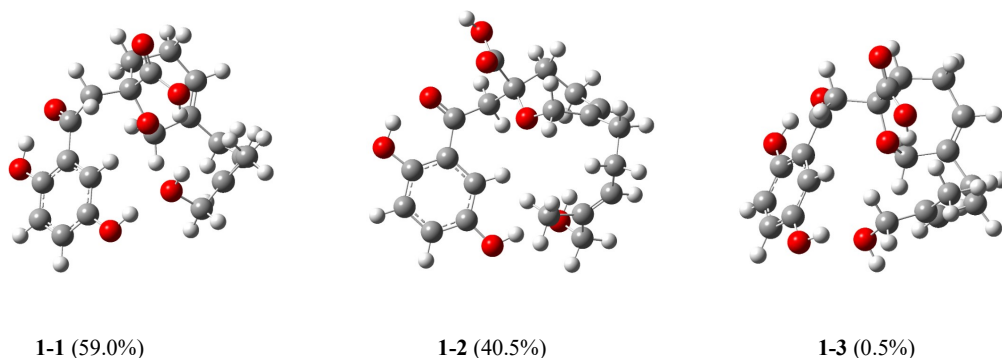

**Figure S60.** The lowest energy conformers of **1** (the relative populations are in parentheses).

**Table S1.** Extracted heats and weighting factors of the optimized conformers of **1** at B3LYP/6-31+G(d) level

|          |           | B3LYP/6-31+G(d) |                                       |
|----------|-----------|-----------------|---------------------------------------|
|          | Conformer | Extracted heats | Boltzmann-calculated contribution (%) |
| <b>1</b> | 1         | -1342.75854813  | 59.0%                                 |
|          | 2         | -1342.75819456  | 40.5%                                 |
|          | 3         | -1342.75389876  | 0.5%                                  |

**Table S2.** The Cartesian coordinates of the lowest energy conformers for **1**

| <b>1-1</b> | X axis(Å) | Y axis(Å) | Z axis(Å) | <b>1-2</b> | X axis(Å) | Y axis(Å) | Z axis(Å) |
|------------|-----------|-----------|-----------|------------|-----------|-----------|-----------|
| C          | 3.8902    | 2.1004    | -0.3912   | C          | -2.9474   | 3.3058    | -0.1748   |
| C          | 2.7175    | 2.0312    | 0.349     | C          | -1.7478   | 2.8322    | 0.3427    |
| C          | 2.1052    | 0.8082    | 0.6126    | C          | -1.5249   | 1.4658    | 0.5153    |
| C          | 2.6561    | -0.3754   | 0.1031    | C          | -2.5285   | 0.5491    | 0.1753    |
| C          | 3.8281    | -0.2962   | -0.6679   | C          | -3.7338   | 1.0366    | -0.3642   |
| C          | 4.4482    | 0.9308    | -0.9034   | C          | -3.9441   | 2.404     | -0.5347   |
| C          | 2.0084    | -1.7044   | 0.3314    | C          | -2.3629   | -0.9224   | 0.3816    |
| C          | 0.9182    | -1.8673   | 1.3664    | C          | -1.2496   | -1.4783   | 1.2528    |
| C          | -0.4945   | -1.7846   | 0.7643    | C          | -0.1272   | -2.1429   | 0.4302    |
| O          | 4.4303    | -1.3893   | -1.2333   | O          | -4.7698   | 0.225     | -0.748    |
| O          | 2.3786    | -2.6651   | -0.3475   | O          | -3.1897   | -1.6816   | -0.133    |

|   |         |         |         |   |         |         |         |
|---|---------|---------|---------|---|---------|---------|---------|
| C | -0.918  | -3.0892 | 0.0588  | C | 0.8454  | -2.8776 | 1.3834  |
| C | -2.3584 | -3.1092 | -0.4688 | C | 1.8604  | -1.9694 | 2.0814  |
| C | -2.7952 | -2.0096 | -1.3948 | C | 2.9786  | -1.4734 | 1.2078  |
| C | -2.0815 | -0.9491 | -1.8196 | C | 2.9499  | -1.2899 | -0.1287 |
| C | -2.7046 | 0.0854  | -2.7373 | C | 4.2257  | -0.924  | -0.8753 |
| C | -3.3216 | 1.2897  | -1.9997 | C | 4.248   | 0.4792  | -1.5075 |
| C | -2.3107 | 2.1838  | -1.3271 | C | 3.9296  | 1.56    | -0.5103 |
| C | -2.3623 | 2.7263  | -0.0921 | C | 2.8631  | 2.3848  | -0.5089 |
| C | -1.2395 | 3.6093  | 0.3961  | C | 2.6226  | 3.3119  | 0.6503  |
| C | -1.4395 | -1.5459 | 1.9597  | C | -0.7558 | -3.1827 | -0.5289 |
| O | -1.5851 | -2.3104 | 2.9018  | O | -0.7278 | -3.1625 | -1.7498 |
| O | -2.0985 | -0.3608 | 1.8722  | O | -1.3745 | -4.1956 | 0.1154  |
| C | -0.653  | -0.7178 | -1.4266 | C | 1.7114  | -1.4468 | -0.9797 |
| O | -0.5955 | -0.5728 | -0.0127 | O | 0.5416  | -1.0754 | -0.2489 |
| C | -3.517  | 2.5834  | 0.8641  | C | 1.8112  | 2.4412  | -1.5845 |
| O | -0.4784 | 2.913   | 1.382   | O | 1.5553  | 2.7628  | 1.4234  |
| O | 2.1744  | 3.198   | 0.8012  | O | -0.8023 | 3.7585  | 0.6722  |
| H | 4.3608  | 3.0612  | -0.5801 | H | -3.1021 | 4.3735  | -0.3027 |
| H | 1.192   | 0.8058  | 1.1958  | H | -0.5649 | 1.1365  | 0.8939  |
| H | 5.3595  | 0.9743  | -1.494  | H | -4.883  | 2.7625  | -0.9475 |
| H | 1.0748  | -2.8324 | 1.8664  | H | -0.8563 | -0.6995 | 1.9116  |
| H | 1.0627  | -1.1249 | 2.16    | H | -1.7284 | -2.2065 | 1.9217  |
| H | 3.8564  | -2.1715 | -1.0721 | H | -4.4639 | -0.7069 | -0.673  |
| H | -0.24   | -3.3185 | -0.7713 | H | 0.2732  | -3.422  | 2.1466  |
| H | -0.8139 | -3.9292 | 0.7593  | H | 1.3927  | -3.6549 | 0.8314  |
| H | -3.0505 | -3.1204 | 0.3824  | H | 2.3217  | -2.5603 | 2.8835  |
| H | -2.5114 | -4.0624 | -0.9907 | H | 1.3721  | -1.1192 | 2.5695  |
| H | -3.8294 | -2.1046 | -1.7285 | H | 3.9147  | -1.3008 | 1.7385  |
| H | -1.9637 | 0.4235  | -3.4731 | H | 5.0909  | -1.0126 | -0.2041 |
| H | -3.5    | -0.3885 | -3.3284 | H | 4.3921  | -1.6694 | -1.6639 |
| H | -3.8556 | 1.8988  | -2.7396 | H | 5.2519  | 0.6677  | -1.9077 |
| H | -4.073  | 0.9198  | -1.2963 | H | 3.5785  | 0.4972  | -2.3708 |
| H | -1.4422 | 2.4133  | -1.9466 | H | 4.6296  | 1.6126  | 0.324   |
| H | -0.5555 | 3.8857  | -0.413  | H | 3.4981  | 3.4146  | 1.2999  |
| H | -1.6228 | 4.5389  | 0.8299  | H | 2.3391  | 4.3131  | 0.3115  |
| H | -1.8272 | 0.0624  | 1.0196  | H | -1.8074 | -4.6978 | -0.6082 |
| H | 0.0239  | -1.4877 | -1.8089 | H | 1.7525  | -0.7573 | -1.8274 |
| H | -0.2868 | 0.2234  | -1.8487 | H | 1.6585  | -2.4583 | -1.3945 |
| H | -4.3441 | 1.9926  | 0.4661  | H | 2.1194  | 1.9639  | -2.5168 |
| H | -3.1928 | 2.1088  | 1.7944  | H | 0.8934  | 1.9553  | -1.2435 |
| H | -3.9202 | 3.5718  | 1.11    | H | 1.579   | 3.4824  | -1.8336 |
| H | -1.0802 | 2.7669  | 2.1359  | H | 1.8537  | 1.8602  | 1.6501  |
| H | 1.2619  | 3.0253  | 1.1232  | H | 0.0048  | 3.3118  | 1.0119  |

| <b>1-3</b> | X axis(Å) | Y axis(Å) | Z axis(Å) |
|------------|-----------|-----------|-----------|
| C          | -3.968    | 2.2265    | 0.3171    |
| C          | -2.7199   | 2.1669    | -0.2899   |
| C          | -2.1018   | 0.9451    | -0.5503   |
| C          | -2.7287   | -0.2488   | -0.1647   |
| C          | -3.9768   | -0.179    | 0.4796    |
| C          | -4.5992   | 1.0479    | 0.706     |
| C          | -2.096    | -1.5858   | -0.3887   |
| C          | -0.9575   | -1.7568   | -1.3684   |
| C          | 0.4208    | -1.7863   | -0.6895   |
| O          | -4.657    | -1.2828   | 0.923     |
| O          | -2.5311   | -2.5524   | 0.242     |
| C          | 0.6743    | -3.0619   | 0.1434    |
| C          | 2.0752    | -3.1693   | 0.7661    |
| C          | 2.5752    | -2.0333   | 1.6167    |
| C          | 1.947     | -0.8773   | 1.9053    |
| C          | 2.6193    | 0.1945    | 2.743     |
| C          | 3.3791    | 1.2597    | 1.9244    |
| C          | 2.5068    | 2.0594    | 0.9866    |
| C          | 2.7696    | 2.421     | -0.2881   |
| C          | 1.7791    | 3.1451    | -1.1779   |
| C          | 1.4477    | -1.7657   | -1.8406   |
| O          | 1.5189    | -2.5997   | -2.7311   |
| O          | 2.2863    | -0.701    | -1.7703   |
| C          | 0.5651    | -0.5665   | 1.4155    |
| O          | 0.6038    | -0.5301   | -0.0058   |
| C          | 4.0782    | 2.1512    | -0.9905   |
| O          | 0.5471    | 3.4096    | -0.5138   |
| O          | -2.1168   | 3.3465    | -0.6128   |
| H          | -4.4404   | 3.1874    | 0.5007    |
| H          | -1.1325   | 0.9508    | -1.0356   |
| H          | -5.5693   | 1.0833    | 1.1946    |
| H          | -1.141    | -2.6878   | -1.9214   |
| H          | -1.0106   | -0.9663   | -2.1262   |
| H          | -4.0745   | -2.0669   | 0.8085    |
| H          | -0.065    | -3.1586   | 0.9462    |
| H          | 0.5271    | -3.9445   | -0.4939   |
| H          | 2.8079    | -3.3288   | -0.0348   |
| H          | 2.1009    | -4.0789   | 1.3796    |
| H          | 3.5812    | -2.1881   | 2.0089    |
| H          | 1.8754    | 0.6758    | 3.391     |
| H          | 3.3357    | -0.2765   | 3.4296    |
| H          | 3.8441    | 1.9602    | 2.6287    |

|   |         |         |         |
|---|---------|---------|---------|
| H | 4.1916  | 0.7586  | 1.3901  |
| H | 1.5485  | 2.3433  | 1.4189  |
| H | 2.1922  | 4.0983  | -1.5242 |
| H | 1.5513  | 2.529   | -2.0538 |
| H | 2.0392  | -0.1796 | -0.9678 |
| H | -0.1932 | -1.248  | 1.8123  |
| H | 0.2528  | 0.4288  | 1.746   |
| H | 4.8363  | 1.6973  | -0.3496 |
| H | 3.9218  | 1.4879  | -1.8465 |
| H | 4.5016  | 3.0914  | -1.3611 |
| H | 0.7598  | 4.0915  | 0.1524  |
| H | -1.1536 | 3.1986  | -0.7444 |

## References

(1) M. J. Frisch, G. W. Trucks, H. B. Schlegel, G. E. Scuseria, M. A. Robb, J. R. Cheeseman, G. Scalmani, V. Barone, B. Mennucci, G. A. Petersson, H. Nakatsuji, M. Caricato, X. Li, H. P. Hratchian, A. F. Izmaylov, J. Bloino, G. Zheng, J. L. Sonnenberg, M. Hada, M. Ehara, K. Toyota, R. Fukuda, J. Hasegawa, M. Ishida, T. Nakajima, Y. Honda, O. Kitao, H. Nakai, T. Vreven, J. A. Montgomery, J. E. Peralta, F. Ogliaro, M. Bearpark, J. J. Heyd, E. Brothers, K. N. Kudin, V. N. Staroverov, R. Kobayashi, J. Normand, K. Raghavachari, A. Rendell, J. C. Burant, S. S. Iyengar, J. Tomasi, M. Cossi, N. Rega, J. M. Millam, M. Klene, J. E. Knox, J. B. Cross, V. Bakken, C. Adamo, J. Jaramillo, R. Gomperts, R. E. Stratmann, O. Yazyev, A. J. Austin, R. Cammi, C. Pomelli, J. W. Ochterski, R. L. Martin, K. Morokuma, V. G. Zakrzewski, G. A. Voth, P. Salvador, J. J. Dannenberg, S. Dapprich, A. D. Daniels, O. Farkas, J. B. Foresman, J. V. Ortiz, J. Cioslowski, D. J. Fox, Gaussian, Inc., Wallingford CT, 2009.

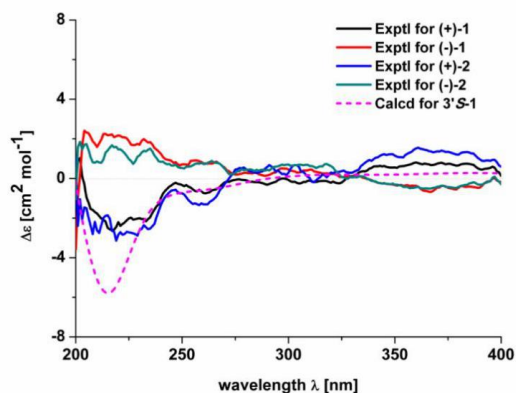

**Figure S61.** The calculated and experimental ECD spectra of 1 and 2.

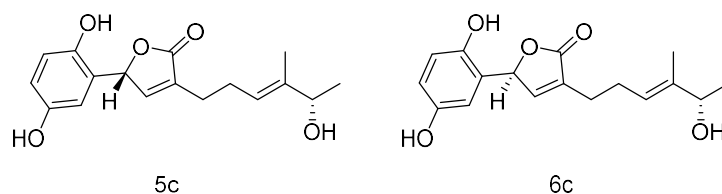

**Figure S62.** The calculated model compounds **5c** and **6c**.

ECD calculation for compounds **5** and **6**

MMFF conformational search generated low-energy conformers within a 10 kcal/mol energy window were performed with Discovery Studio Client 4.0,<sup>1</sup> which given the 4 stable conformer of (7'*R*, 10'*S*)-**5c** as **5c1**, **5c2**, **5c3** and **5c4** and 4 stable conformers of (6'*S*, 7'*R*)-**6c** as **6c1**, **6c2**, **6c3** and **6c4**. The ECD calculations was using TD-DFT-B3LYP/6-31G (d,p) of theory on B3LYP/6-31G(d,p) optimized geometries through the CPCM model (in MeOH). The calculated ECD curve of **5c** and **6c** was generated using SpecDis 1.61<sup>2</sup> with  $\sigma=0.20$  ev, UV shift 1 nm,  $\sigma=0.20$  ev, UV shift 1 nm, respectively. All the above calculations were carried out with the Gaussian 09 package of programs.<sup>3</sup>

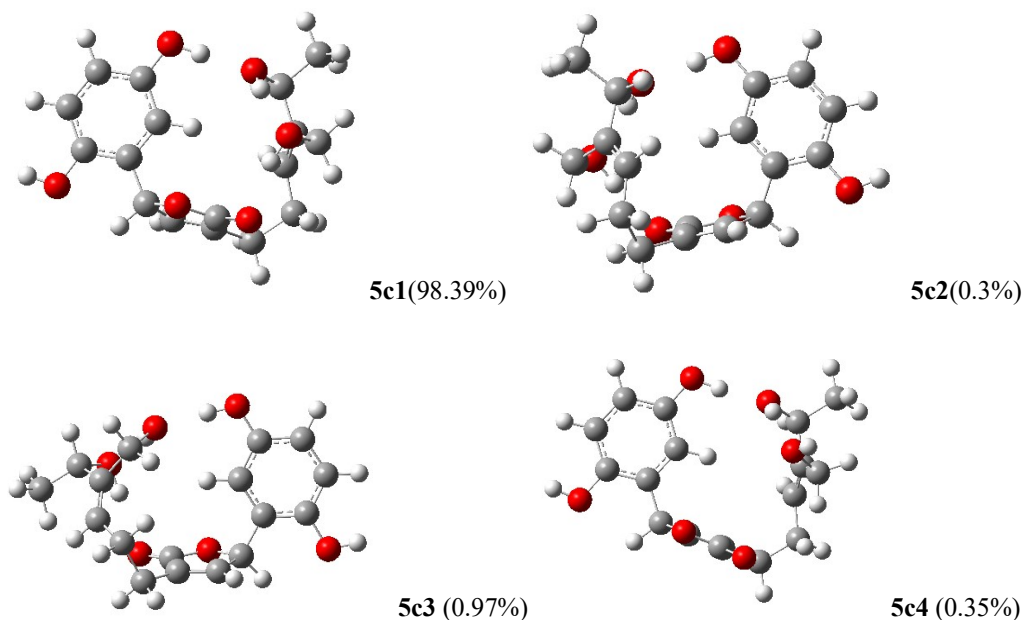

**Table S3.** Standard orientation of **5c** in MeOH

|     |
|-----|
| 5c1 |
|-----|

| Center Number | Atomic Number | Atomic Type | X         | Y         | Z         |
|---------------|---------------|-------------|-----------|-----------|-----------|
| 1             | 8             | 0           | 1.463270  | 2.376373  | 0.452175  |
| 2             | 8             | 0           | 2.523892  | 0.397950  | 2.024134  |
| 3             | 8             | 0           | -0.886608 | -1.733195 | 1.362310  |
| 4             | 8             | 0           | 1.299971  | -2.177481 | 1.637155  |
| 5             | 6             | 0           | 3.416499  | 0.204019  | 0.903210  |
| 6             | 6             | 0           | 0.327956  | -2.123806 | 0.897723  |
| 7             | 8             | 0           | -1.108327 | 3.200498  | 0.034201  |
| 8             | 8             | 0           | -4.568049 | -1.132547 | -0.169072 |
| 9             | 6             | 0           | 3.435699  | 2.870128  | -0.876584 |
| 10            | 6             | 0           | 2.274341  | 1.897687  | -0.654264 |
| 11            | 6             | 0           | 2.705544  | 0.458564  | -0.410302 |
| 12            | 6             | 0           | 2.402958  | -0.497374 | -1.303817 |
| 13            | 6             | 0           | 2.678572  | -1.973933 | -1.211731 |
| 14            | 6             | 0           | 1.397167  | -2.828427 | -1.405144 |
| 15            | 6             | 0           | 0.233952  | -2.401330 | -0.555006 |
| 16            | 6             | 0           | -1.033990 | -2.152892 | -0.913573 |
| 17            | 6             | 0           | -1.837293 | -1.679874 | 0.264495  |
| 18            | 6             | 0           | -3.735960 | -0.041187 | -0.111043 |
| 19            | 6             | 0           | -2.370382 | -0.267978 | 0.104667  |
| 20            | 6             | 0           | -1.488830 | 0.815461  | 0.147463  |
| 21            | 6             | 0           | -1.943620 | 2.127979  | -0.007230 |
| 22            | 6             | 0           | -3.313446 | 2.347147  | -0.214454 |
| 23            | 6             | 0           | -4.196869 | 1.271771  | -0.266919 |
| 24            | 1             | 0           | 1.663836  | 1.813883  | 1.230266  |
| 25            | 1             | 0           | 1.975099  | -0.407279 | 2.077704  |
| 26            | 1             | 0           | 4.226419  | 0.925588  | 1.045990  |
| 27            | 1             | 0           | 3.859745  | -0.793042 | 0.943252  |

|    |   |   |           |           |           |
|----|---|---|-----------|-----------|-----------|
| 28 | 1 | 0 | -0.182242 | 2.896661  | 0.196806  |
| 29 | 1 | 0 | -5.483751 | -0.833741 | -0.253324 |
| 30 | 1 | 0 | 4.104596  | 2.904067  | -0.011568 |
| 31 | 1 | 0 | 4.018605  | 2.578205  | -1.755823 |
| 32 | 1 | 0 | 3.044434  | 3.878633  | -1.039551 |
| 33 | 1 | 0 | 1.627974  | 1.921604  | -1.538760 |
| 34 | 1 | 0 | 1.867654  | -0.190043 | -2.204347 |
| 35 | 1 | 0 | 3.387057  | -2.269435 | -1.996482 |
| 36 | 1 | 0 | 3.135129  | -2.232431 | -0.255853 |
| 37 | 1 | 0 | 1.081683  | -2.795097 | -2.452877 |
| 38 | 1 | 0 | 1.648979  | -3.873352 | -1.185782 |
| 39 | 1 | 0 | -1.460092 | -2.226161 | -1.907136 |
| 40 | 1 | 0 | -2.657084 | -2.363576 | 0.503525  |
| 41 | 1 | 0 | -0.432484 | 0.642294  | 0.316310  |
| 42 | 1 | 0 | -3.675940 | 3.363011  | -0.334479 |
| 43 | 1 | 0 | -5.256592 | 1.451689  | -0.430039 |

|            |   |   |           |           |           |
|------------|---|---|-----------|-----------|-----------|
| <b>5c2</b> |   |   |           |           |           |
| 1          | 8 | 0 | -1.586353 | 2.173962  | -0.788937 |
| 2          | 8 | 0 | -2.976466 | -0.038454 | -1.692774 |
| 3          | 8 | 0 | 1.109028  | -1.809363 | -1.453589 |
| 4          | 8 | 0 | -1.052103 | -2.163480 | -1.972010 |
| 5          | 6 | 0 | -3.513097 | -0.136445 | -0.354826 |
| 6          | 6 | 0 | -0.168167 | -2.119941 | -1.128187 |
| 7          | 8 | 0 | 0.949866  | 3.152618  | -0.405453 |
| 8          | 8 | 0 | 4.541748  | -0.982364 | 0.489517  |
| 9          | 6 | 0 | -3.458277 | 2.860217  | 0.605101  |
| 10         | 6 | 0 | -2.242002 | 1.938041  | 0.484123  |
| 11         | 6 | 0 | -2.561521 | 0.459935  | 0.659549  |



|    |   |   |           |           |           |
|----|---|---|-----------|-----------|-----------|
| 12 | 6 | 0 | -1.969037 | -0.235479 | 1.642586  |
| 13 | 6 | 0 | -2.122680 | -1.701732 | 2.001448  |
| 14 | 6 | 0 | -1.582403 | -2.720622 | 0.959867  |
| 15 | 6 | 0 | -0.269146 | -2.351265 | 0.331212  |
| 16 | 6 | 0 | 0.947504  | -2.119498 | 0.844992  |
| 17 | 6 | 0 | 1.897875  | -1.685077 | -0.237589 |
| 18 | 6 | 0 | 3.677376  | 0.061223  | 0.266620  |
| 19 | 6 | 0 | 2.357366  | -0.244249 | -0.087937 |
| 20 | 6 | 0 | 1.443745  | 0.791115  | -0.303362 |
| 21 | 6 | 0 | 1.822355  | 2.130093  | -0.189051 |
| 22 | 6 | 0 | 3.147444  | 2.429577  | 0.158916  |
| 23 | 6 | 0 | 4.061177  | 1.403088  | 0.386003  |
| 24 | 1 | 0 | -1.953574 | 1.519373  | -1.418333 |
| 25 | 1 | 0 | -2.342708 | -0.772269 | -1.813087 |
| 26 | 1 | 0 | -4.453077 | 0.423789  | -0.375103 |
| 27 | 1 | 0 | -3.762271 | -1.173732 | -0.114818 |
| 28 | 1 | 0 | 0.063015  | 2.786792  | -0.634511 |
| 29 | 1 | 0 | 5.430503  | -0.635506 | 0.647774  |
| 30 | 1 | 0 | -4.197203 | 2.656537  | -0.175550 |
| 31 | 1 | 0 | -3.941150 | 2.738962  | 1.580096  |
| 32 | 1 | 0 | -3.140187 | 3.901688  | 0.503146  |
| 33 | 1 | 0 | -1.509917 | 2.225830  | 1.246189  |
| 34 | 1 | 0 | -1.281080 | 0.317153  | 2.281543  |
| 35 | 1 | 0 | -1.600869 | -1.866878 | 2.948570  |
| 36 | 1 | 0 | -3.174001 | -1.948892 | 2.190026  |
| 37 | 1 | 0 | -1.498734 | -3.698041 | 1.447813  |
| 38 | 1 | 0 | -2.302728 | -2.845998 | 0.146560  |
| 39 | 1 | 0 | 1.249645  | -2.168723 | 1.884353  |
| 40 | 1 | 0 | 2.759917  | -2.350930 | -0.329072 |

|    |   |   |          |          |           |
|----|---|---|----------|----------|-----------|
| 41 | 1 | 0 | 0.419559 | 0.562015 | -0.573607 |
| 42 | 1 | 0 | 3.452198 | 3.467167 | 0.249939  |
| 43 | 1 | 0 | 5.085813 | 1.644412 | 0.657255  |

| 5c3           |               |             |           |           |           |
|---------------|---------------|-------------|-----------|-----------|-----------|
| Center Number | Atomic Number | Atomic Type | X         | Y         | Z         |
| 1             | 8             | 0           | -2.564922 | 1.248193  | -1.711573 |
| 2             | 8             | 0           | -1.073628 | 2.428219  | 0.225483  |
| 3             | 8             | 0           | 0.669645  | -1.515283 | -1.461200 |
| 4             | 8             | 0           | -1.575400 | -1.643555 | -1.531139 |
| 5             | 6             | 0           | -1.886161 | 1.763360  | 1.216606  |
| 6             | 6             | 0           | -0.541791 | -1.775546 | -0.897174 |
| 7             | 8             | 0           | 1.593753  | 3.129978  | 0.456980  |
| 8             | 8             | 0           | 4.553703  | -1.483619 | -0.418895 |
| 9             | 6             | 0           | -4.785579 | 0.448116  | -1.066547 |
| 10            | 6             | 0           | -3.544845 | 1.217507  | -0.630188 |
| 11            | 6             | 0           | -2.814569 | 0.730540  | 0.616099  |
| 12            | 6             | 0           | -2.940689 | -0.533050 | 1.045172  |
| 13            | 6             | 0           | -2.149107 | -1.284063 | 2.077301  |
| 14            | 6             | 0           | -1.457958 | -2.533569 | 1.457760  |
| 15            | 6             | 0           | -0.339762 | -2.203708 | 0.511415  |
| 16            | 6             | 0           | 0.982239  | -2.191794 | 0.735283  |
| 17            | 6             | 0           | 1.722414  | -1.703223 | -0.477105 |
| 18            | 6             | 0           | 3.846850  | -0.324991 | -0.209217 |
| 19            | 6             | 0           | 2.447957  | -0.392196 | -0.235209 |
| 20            | 6             | 0           | 1.699082  | 0.763887  | -0.008013 |
| 21            | 6             | 0           | 2.311964  | 1.994555  | 0.235445  |

|    |   |   |           |           |           |
|----|---|---|-----------|-----------|-----------|
| 22 | 6 | 0 | 3.712628  | 2.057135  | 0.254879  |
| 23 | 6 | 0 | 4.467531  | 0.906742  | 0.035382  |
| 24 | 1 | 0 | -2.240861 | 0.332757  | -1.814397 |
| 25 | 1 | 0 | -1.373765 | 2.122489  | -0.657586 |
| 26 | 1 | 0 | -1.222379 | 1.324884  | 1.966523  |
| 27 | 1 | 0 | -2.488632 | 2.533221  | 1.721531  |
| 28 | 1 | 0 | 0.632953  | 2.916550  | 0.404248  |
| 29 | 1 | 0 | 5.499346  | -1.282491 | -0.441669 |
| 30 | 1 | 0 | -4.548841 | -0.589777 | -1.318496 |
| 31 | 1 | 0 | -5.546887 | 0.450266  | -0.280962 |
| 32 | 1 | 0 | -5.205837 | 0.921754  | -1.957622 |
| 33 | 1 | 0 | -3.816914 | 2.271068  | -0.495800 |
| 34 | 1 | 0 | -3.680103 | -1.155107 | 0.545102  |
| 35 | 1 | 0 | -1.397278 | -0.658977 | 2.566728  |
| 36 | 1 | 0 | -2.824999 | -1.644711 | 2.863747  |
| 37 | 1 | 0 | -1.060406 | -3.150811 | 2.268763  |
| 38 | 1 | 0 | -2.211588 | -3.133082 | 0.933858  |
| 39 | 1 | 0 | 1.493149  | -2.444724 | 1.656894  |
| 40 | 1 | 0 | 2.414944  | -2.452007 | -0.871698 |
| 41 | 1 | 0 | 0.617202  | 0.717892  | -0.034557 |
| 42 | 1 | 0 | 4.201547  | 3.007564  | 0.443205  |
| 43 | 1 | 0 | 5.552911  | 0.963564  | 0.053606  |

| 5c4           |               |             |           |           |          |
|---------------|---------------|-------------|-----------|-----------|----------|
| Center Number | Atomic Number | Atomic Type | X         | Y         | Z        |
| 1             | 8             | 0           | 1.813466  | 2.489076  | 0.096612 |
| 2             | 8             | 0           | 3.331271  | 1.196439  | 1.875156 |
| 3             | 8             | 0           | -1.418958 | -1.923839 | 1.129132 |

|    |   |   |           |           |           |
|----|---|---|-----------|-----------|-----------|
| 4  | 8 | 0 | 0.509513  | -2.914867 | 1.747792  |
| 5  | 6 | 0 | 2.769094  | 0.015587  | 1.272890  |
| 6  | 6 | 0 | -0.209122 | -2.493648 | 0.861931  |
| 7  | 8 | 0 | -0.779053 | 3.261197  | -0.055529 |
| 8  | 8 | 0 | -4.729868 | -0.632373 | -0.068460 |
| 9  | 6 | 0 | 4.003588  | 2.252498  | -0.960790 |
| 10 | 6 | 0 | 2.611359  | 1.642926  | -0.757422 |
| 11 | 6 | 0 | 2.650346  | 0.210246  | -0.230680 |
| 12 | 6 | 0 | 2.544604  | -0.816134 | -1.087021 |
| 13 | 6 | 0 | 2.560255  | -2.287268 | -0.772252 |
| 14 | 6 | 0 | 1.270507  | -3.015487 | -1.235097 |
| 15 | 6 | 0 | 0.018695  | -2.481846 | -0.606118 |
| 16 | 6 | 0 | -1.061734 | -1.926544 | -1.169169 |
| 17 | 6 | 0 | -2.061303 | -1.527773 | -0.121344 |
| 18 | 6 | 0 | -3.762297 | 0.342277  | -0.062824 |
| 19 | 6 | 0 | -2.417860 | -0.056217 | -0.096775 |
| 20 | 6 | 0 | -1.409954 | 0.917378  | -0.093757 |
| 21 | 6 | 0 | -1.719786 | 2.280644  | -0.054134 |
| 22 | 6 | 0 | -3.069108 | 2.665144  | -0.023552 |
| 23 | 6 | 0 | -4.076028 | 1.706202  | -0.030466 |
| 24 | 1 | 0 | 2.211407  | 2.404666  | 0.985062  |
| 25 | 1 | 0 | 3.251745  | 1.104710  | 2.834167  |
| 26 | 1 | 0 | 3.396754  | -0.851705 | 1.505066  |
| 27 | 1 | 0 | 1.776954  | -0.178421 | 1.702237  |
| 28 | 1 | 0 | 0.132037  | 2.883295  | -0.024687 |
| 29 | 1 | 0 | -5.601753 | -0.216983 | -0.020866 |
| 30 | 1 | 0 | 4.560382  | 2.272648  | -0.020989 |
| 31 | 1 | 0 | 4.571133  | 1.662789  | -1.687050 |
| 32 | 1 | 0 | 3.907932  | 3.274254  | -1.340991 |

|    |   |   |           |           |           |
|----|---|---|-----------|-----------|-----------|
| 33 | 1 | 0 | 2.089831  | 1.639864  | -1.719339 |
| 34 | 1 | 0 | 2.411164  | -0.575413 | -2.143110 |
| 35 | 1 | 0 | 3.402418  | -2.761756 | -1.293438 |
| 36 | 1 | 0 | 2.699804  | -2.469877 | 0.295226  |
| 37 | 1 | 0 | 1.176123  | -2.947975 | -2.323747 |
| 38 | 1 | 0 | 1.374251  | -4.079040 | -0.987354 |
| 39 | 1 | 0 | -1.237658 | -1.758733 | -2.225234 |
| 40 | 1 | 0 | -2.977835 | -2.118957 | -0.203489 |
| 41 | 1 | 0 | -0.370151 | 0.606038  | -0.126664 |
| 42 | 1 | 0 | -3.315203 | 3.721845  | 0.003415  |
| 43 | 1 | 0 | -5.117847 | 2.015784  | -0.006371 |

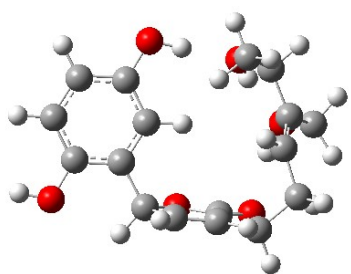

**6c1**(89.7%)

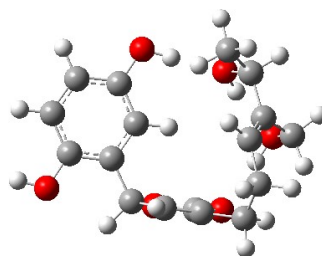

**6c2**(0.14%)

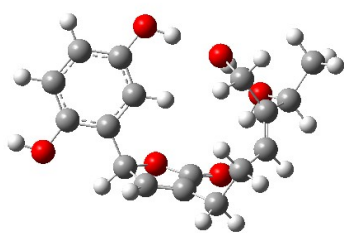

**6c3**(8.91%)

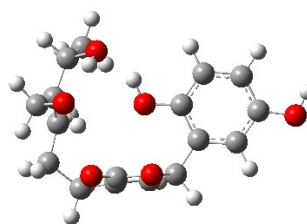

**6c4**(1.24%)

**Table S4.** Standard orientation of **6c** in MeOH

|               |               |             |          |          |           |
|---------------|---------------|-------------|----------|----------|-----------|
| <b>6c1</b>    |               |             |          |          |           |
| Center Number | Atomic Number | Atomic Type | X        | Y        | Z         |
| 1             | 8             | 0           | 1.772856 | 2.609826 | -0.301924 |

|    |   |   |           |           |           |
|----|---|---|-----------|-----------|-----------|
| 2  | 8 | 0 | 2.716381  | 0.843595  | -2.067351 |
| 3  | 8 | 0 | -0.990032 | -1.917865 | -1.367405 |
| 4  | 8 | 0 | 1.134669  | -2.476564 | -1.787236 |
| 5  | 6 | 0 | 3.573065  | 0.387420  | -0.991600 |
| 6  | 6 | 0 | 0.256663  | -2.270801 | -0.961568 |
| 7  | 8 | 0 | -1.203020 | 3.130931  | -0.728761 |
| 8  | 8 | 0 | -4.458436 | -1.168296 | 0.623528  |
| 9  | 6 | 0 | 2.127371  | 2.386598  | 2.058493  |
| 10 | 6 | 0 | 2.686061  | 2.056042  | 0.684476  |
| 11 | 6 | 0 | 2.941213  | 0.586289  | 0.375990  |
| 12 | 6 | 0 | 2.600971  | -0.403758 | 1.213115  |
| 13 | 6 | 0 | 2.785822  | -1.890476 | 1.033982  |
| 14 | 6 | 0 | 1.508011  | -2.733412 | 1.318478  |
| 15 | 6 | 0 | 0.283557  | -2.371196 | 0.521061  |
| 16 | 6 | 0 | -0.957899 | -2.085969 | 0.951858  |
| 17 | 6 | 0 | -1.853677 | -1.741842 | -0.211372 |
| 18 | 6 | 0 | -3.688694 | -0.076838 | 0.285772  |
| 19 | 6 | 0 | -2.380240 | -0.320321 | -0.151611 |
| 20 | 6 | 0 | -1.547148 | 0.745780  | -0.487751 |
| 21 | 6 | 0 | -1.992742 | 2.068450  | -0.399013 |
| 22 | 6 | 0 | -3.308372 | 2.309525  | 0.030714  |
| 23 | 6 | 0 | -4.143048 | 1.245366  | 0.366511  |
| 24 | 1 | 0 | 1.973580  | 2.169545  | -1.150454 |
| 25 | 1 | 0 | 2.075353  | 0.129717  | -2.225970 |
| 26 | 1 | 0 | 3.871469  | -0.650735 | -1.147758 |
| 27 | 1 | 0 | 4.475546  | 1.005401  | -1.074032 |
| 28 | 1 | 0 | -0.299145 | 2.804387  | -0.933648 |
| 29 | 1 | 0 | -5.352513 | -0.879140 | 0.844345  |
| 30 | 1 | 0 | 2.799311  | 2.038023  | 2.845658  |

|    |   |   |           |           |           |
|----|---|---|-----------|-----------|-----------|
| 31 | 1 | 0 | 2.020061  | 3.470590  | 2.151947  |
| 32 | 1 | 0 | 1.144514  | 1.929354  | 2.205203  |
| 33 | 1 | 0 | 3.651502  | 2.576399  | 0.563955  |
| 34 | 1 | 0 | 2.166364  | -0.124383 | 2.172635  |
| 35 | 1 | 0 | 3.177412  | -2.134652 | 0.047187  |
| 36 | 1 | 0 | 3.531015  | -2.233707 | 1.764602  |
| 37 | 1 | 0 | 1.758021  | -3.785767 | 1.131418  |
| 38 | 1 | 0 | 1.246376  | -2.665164 | 2.378645  |
| 39 | 1 | 0 | -1.308917 | -2.054671 | 1.977414  |
| 40 | 1 | 0 | -2.692809 | -2.437205 | -0.312583 |
| 41 | 1 | 0 | -0.536329 | 0.554644  | -0.825291 |
| 42 | 1 | 0 | -3.665485 | 3.331701  | 0.095756  |
| 43 | 1 | 0 | -5.160158 | 1.437499  | 0.698958  |

|                  |                  |                |           |           |           |
|------------------|------------------|----------------|-----------|-----------|-----------|
| <b>6c2</b>       |                  |                |           |           |           |
| Center<br>Number | Atomic<br>Number | Atomic<br>Type | X         | Y         | Z         |
| 1                | 8                | 0              | 1.397622  | 2.313716  | -0.929583 |
| 2                | 8                | 0              | 2.949487  | 0.207657  | -1.830803 |
| 3                | 8                | 0              | -0.862138 | -2.021131 | -1.322374 |
| 4                | 8                | 0              | 1.299325  | -2.163809 | -1.932937 |
| 5                | 6                | 0              | 3.576958  | 0.246131  | -0.530232 |
| 6                | 6                | 0              | 0.456337  | -2.150884 | -1.046943 |
| 7                | 8                | 0              | -1.265195 | 3.009838  | -0.637712 |
| 8                | 8                | 0              | -4.331677 | -1.458478 | 0.559584  |
| 9                | 6                | 0              | 1.506548  | 2.986340  | 1.368169  |
| 10               | 6                | 0              | 2.238449  | 2.254029  | 0.253644  |
| 11               | 6                | 0              | 2.648107  | 0.809528  | 0.525426  |
| 12               | 6                | 0              | 2.198682  | 0.117160  | 1.582664  |

|    |   |   |           |           |           |
|----|---|---|-----------|-----------|-----------|
| 13 | 6 | 0 | 2.495824  | -1.318209 | 1.979267  |
| 14 | 6 | 0 | 2.030083  | -2.423187 | 0.993972  |
| 15 | 6 | 0 | 0.654694  | -2.238462 | 0.418697  |
| 16 | 6 | 0 | -0.553639 | -2.093243 | 0.981869  |
| 17 | 6 | 0 | -1.601919 | -1.878469 | -0.075641 |
| 18 | 6 | 0 | -3.596668 | -0.336881 | 0.264826  |
| 19 | 6 | 0 | -2.238707 | -0.500167 | -0.037096 |
| 20 | 6 | 0 | -1.456483 | 0.621612  | -0.326469 |
| 21 | 6 | 0 | -2.004868 | 1.905593  | -0.341179 |
| 22 | 6 | 0 | -3.366480 | 2.061684  | -0.043527 |
| 23 | 6 | 0 | -4.149470 | 0.950389  | 0.258738  |
| 24 | 1 | 0 | 1.764974  | 1.660191  | -1.559594 |
| 25 | 1 | 0 | 2.412917  | -0.606680 | -1.881781 |
| 26 | 1 | 0 | 3.957408  | -0.741946 | -0.257828 |
| 27 | 1 | 0 | 4.442714  | 0.908702  | -0.645150 |
| 28 | 1 | 0 | -0.327658 | 2.747685  | -0.791586 |
| 29 | 1 | 0 | -5.259030 | -1.212373 | 0.680173  |
| 30 | 1 | 0 | 2.131218  | 3.051240  | 2.262685  |
| 31 | 1 | 0 | 1.272198  | 4.002207  | 1.038606  |
| 32 | 1 | 0 | 0.567288  | 2.491557  | 1.629259  |
| 33 | 1 | 0 | 3.160238  | 2.814367  | 0.028532  |
| 34 | 1 | 0 | 1.536436  | 0.637278  | 2.270018  |
| 35 | 1 | 0 | 3.571191  | -1.457653 | 2.143954  |
| 36 | 1 | 0 | 2.020956  | -1.497850 | 2.948236  |
| 37 | 1 | 0 | 2.721973  | -2.496412 | 0.150578  |
| 38 | 1 | 0 | 2.084123  | -3.386750 | 1.513539  |
| 39 | 1 | 0 | -0.797465 | -2.081448 | 2.037526  |
| 40 | 1 | 0 | -2.374377 | -2.651601 | -0.057379 |
| 41 | 1 | 0 | -0.403393 | 0.502960  | -0.554113 |



|    |   |   |           |          |           |
|----|---|---|-----------|----------|-----------|
| 42 | 1 | 0 | -3.801881 | 3.055713 | -0.050948 |
| 43 | 1 | 0 | -5.203915 | 1.080686 | 0.488769  |

| <b>6c3</b>    |               |             |           |           |           |
|---------------|---------------|-------------|-----------|-----------|-----------|
| Center Number | Atomic Number | Atomic Type | X         | Y         | Z         |
| 1             | 8             | 0           | 2.711414  | 0.876710  | -1.768912 |
| 2             | 8             | 0           | 1.357717  | 2.181727  | 0.221610  |
| 3             | 8             | 0           | -0.849214 | -1.484968 | -1.523068 |
| 4             | 8             | 0           | 1.366323  | -1.856722 | -1.649402 |
| 5             | 6             | 0           | 2.084638  | 1.396267  | 1.192723  |
| 6             | 6             | 0           | 0.336854  | -1.897219 | -0.996849 |
| 7             | 8             | 0           | -1.213522 | 3.173592  | 0.526009  |
| 8             | 8             | 0           | -4.680977 | -1.071632 | -0.348522 |
| 9             | 6             | 0           | 4.505275  | 1.949703  | -0.599501 |
| 10            | 6             | 0           | 3.676022  | 0.674841  | -0.695516 |
| 11            | 6             | 0           | 2.895113  | 0.292760  | 0.552447  |
| 12            | 6             | 0           | 2.890784  | -0.993739 | 0.931678  |
| 13            | 6             | 0           | 2.048996  | -1.699858 | 1.954573  |
| 14            | 6             | 0           | 1.210020  | -2.839586 | 1.306719  |
| 15            | 6             | 0           | 0.116499  | -2.351597 | 0.400663  |
| 16            | 6             | 0           | -1.191030 | -2.200772 | 0.656693  |
| 17            | 6             | 0           | -1.896052 | -1.589941 | -0.520988 |
| 18            | 6             | 0           | -3.847783 | -0.000349 | -0.138970 |
| 19            | 6             | 0           | -2.466108 | -0.215845 | -0.219671 |
| 20            | 6             | 0           | -1.589446 | 0.846565  | 0.006927  |
| 21            | 6             | 0           | -2.057337 | 2.128231  | 0.303442  |
| 22            | 6             | 0           | -3.441441 | 2.339979  | 0.375932  |
| 23            | 6             | 0           | -4.323412 | 1.283521  | 0.157267  |

|    |   |   |           |           |           |
|----|---|---|-----------|-----------|-----------|
| 24 | 1 | 0 | 2.253068  | 0.024039  | -1.892983 |
| 25 | 1 | 0 | 1.617015  | 1.865316  | -0.669877 |
| 26 | 1 | 0 | 2.753993  | 2.078514  | 1.735088  |
| 27 | 1 | 0 | 1.369958  | 0.998361  | 1.918426  |
| 28 | 1 | 0 | -0.283943 | 2.858384  | 0.440674  |
| 29 | 1 | 0 | -5.600110 | -0.771737 | -0.330578 |
| 30 | 1 | 0 | 5.262502  | 1.849873  | 0.183487  |
| 31 | 1 | 0 | 5.012146  | 2.134856  | -1.550494 |
| 32 | 1 | 0 | 3.878625  | 2.816110  | -0.371291 |
| 33 | 1 | 0 | 4.334846  | -0.158859 | -0.968287 |
| 34 | 1 | 0 | 3.548805  | -1.663916 | 0.377096  |
| 35 | 1 | 0 | 2.700277  | -2.163950 | 2.706758  |
| 36 | 1 | 0 | 1.382968  | -1.017409 | 2.490068  |
| 37 | 1 | 0 | 1.881378  | -3.497561 | 0.742652  |
| 38 | 1 | 0 | 0.762754  | -3.440645 | 2.103848  |
| 39 | 1 | 0 | -1.708563 | -2.428596 | 1.581159  |
| 40 | 1 | 0 | -2.675579 | -2.243143 | -0.923197 |
| 41 | 1 | 0 | -0.520617 | 0.685513  | -0.062484 |
| 42 | 1 | 0 | -3.817826 | 3.331756  | 0.605108  |
| 43 | 1 | 0 | -5.395193 | 1.455670  | 0.217702  |

|                  |                  |                |           |           |          |
|------------------|------------------|----------------|-----------|-----------|----------|
| <b>6c4</b>       |                  |                |           |           |          |
| Center<br>Number | Atomic<br>Number | Atomic<br>Type | X         | Y         | Z        |
| 1                | 8                | 0              | -1.383954 | 2.616106  | 0.609685 |
| 2                | 8                | 0              | -2.575385 | 0.722434  | 2.210809 |
| 3                | 8                | 0              | 0.629572  | -1.876410 | 1.196151 |
| 4                | 8                | 0              | -1.577249 | -1.921498 | 1.606658 |

|    |   |   |           |           |           |
|----|---|---|-----------|-----------|-----------|
| 5  | 6 | 0 | -3.561413 | 0.659542  | 1.156543  |
| 6  | 6 | 0 | -0.661027 | -1.988308 | 0.798733  |
| 7  | 8 | 0 | 5.886918  | 0.267734  | -0.046601 |
| 8  | 8 | 0 | 0.369645  | 0.695375  | 0.001973  |
| 9  | 6 | 0 | -1.915940 | 2.770303  | -1.720212 |
| 10 | 6 | 0 | -2.449373 | 2.364929  | -0.355197 |
| 11 | 6 | 0 | -2.949358 | 0.932319  | -0.203121 |
| 12 | 6 | 0 | -2.803447 | 0.000228  | -1.156930 |
| 13 | 6 | 0 | -3.163171 | -1.460244 | -1.083719 |
| 14 | 6 | 0 | -1.979102 | -2.390316 | -1.455245 |
| 15 | 6 | 0 | -0.714038 | -2.172365 | -0.671694 |
| 16 | 6 | 0 | 0.547290  | -2.082874 | -1.113964 |
| 17 | 6 | 0 | 1.500785  | -1.873749 | 0.030463  |
| 18 | 6 | 0 | 1.723872  | 0.662311  | 0.008861  |
| 19 | 6 | 0 | 2.336095  | -0.609465 | -0.000728 |
| 20 | 6 | 0 | 3.728373  | -0.703160 | -0.016389 |
| 21 | 6 | 0 | 4.526229  | 0.444950  | -0.026592 |
| 22 | 6 | 0 | 3.918405  | 1.702503  | -0.005611 |
| 23 | 6 | 0 | 2.526103  | 1.807656  | 0.011404  |
| 24 | 1 | 0 | -1.639733 | 2.126543  | 1.421420  |
| 25 | 1 | 0 | -2.052609 | -0.098569 | 2.136009  |
| 26 | 1 | 0 | -4.083912 | -0.299219 | 1.189370  |
| 27 | 1 | 0 | -4.292434 | 1.440183  | 1.396138  |
| 28 | 1 | 0 | 6.320410  | 1.132091  | -0.037052 |
| 29 | 1 | 0 | -0.034599 | 1.576157  | 0.191092  |
| 30 | 1 | 0 | -1.066582 | 2.147459  | -2.014285 |
| 31 | 1 | 0 | -2.694492 | 2.690830  | -2.483419 |
| 32 | 1 | 0 | -1.578979 | 3.809921  | -1.680626 |
| 33 | 1 | 0 | -3.282138 | 3.037620  | -0.095622 |

|    |   |   |           |           |           |
|----|---|---|-----------|-----------|-----------|
| 34 | 1 | 0 | -2.351454 | 0.299576  | -2.101673 |
| 35 | 1 | 0 | -3.528889 | -1.732838 | -0.093582 |
| 36 | 1 | 0 | -3.970778 | -1.675980 | -1.796112 |
| 37 | 1 | 0 | -2.313951 | -3.426531 | -1.316521 |
| 38 | 1 | 0 | -1.741521 | -2.282114 | -2.518937 |
| 39 | 1 | 0 | 0.887068  | -2.140181 | -2.141491 |
| 40 | 1 | 0 | 2.171661  | -2.735073 | 0.132531  |
| 41 | 1 | 0 | 4.210947  | -1.676037 | -0.014906 |
| 42 | 1 | 0 | 4.526888  | 2.603525  | -0.004065 |
| 43 | 1 | 0 | 2.057019  | 2.787146  | 0.022713  |

### References

- (1) Discovery Studio v4.0 client Copyright @2005-13 Accelrys software Inc.
- (2) Bruhn T.; Schaumlöffel A.; Hemberger Y.; Bringmann G.; *SpecDis*, version 1.61, University of Wuerzburg, Germany, **2013**.
- (3) Frisch, M. J.; Trucks, G. W.; Schlegel, H. B.; Scuseria, G. E.; Robb, M. A.; Cheeseman, J. R.; Scalmani, G.; Barone, V.; Mennucci, B.; Petersson, G. A.; Nakatsuji, H.; Caricato, M.; Li, X.; Hratchian, H. P.; Izmaylov, A. F.; Bloino, J.; Zheng, G.; Sonnenberg, J. L.; Hada, M.; Ehara, M.; Toyota, K.; Fukuda, R.; Hasegawa, J.; Ishida, M.; Nakajima, T.; Honda, Y.; Kitao, O.; Nakai, H.; Vreven, T.; Montgomery, J. A.; Peralta, J. E.; Ogliaro, F.; Bearpark, M.; Heyd, J. J.; Brothers, E.; Kudin, K. N.; Staroverov, V. N.; Keith, T.; Kobayashi, R.; Normand, J.; Raghavachari, K.; Rendell, A.; Burant, J. C.; Iyengar, S. S.; Tomasi, J.; Cossi, M.; Rega, N.; Millam, J. M.; Klene, M.; Knox, J. E.; Cross, J. B.; Bakken, V.; Adamo, C.; Jaramillo, J.; Gomperts, R.; Stratmann, R. E.; Yazyev, O.; Austin, A. J.; Cammi, R.; Pomelli, C.; Ochterski, J. W.; Martin, R. L.; Morokuma, K.; Zakrzewski, V. G.; Voth, G. A.; Salvador, P.; Dannenberg, J. J.; Dapprich, S.; Daniels, A. D.; Farkas, O.; Foresman, J. B.; Ortiz, J. V.; Cioslowski, J.; Fox, D. J. *Gaussian 09*, revision C.01. Gaussian, Inc.: Wallingford CT, **2010**.

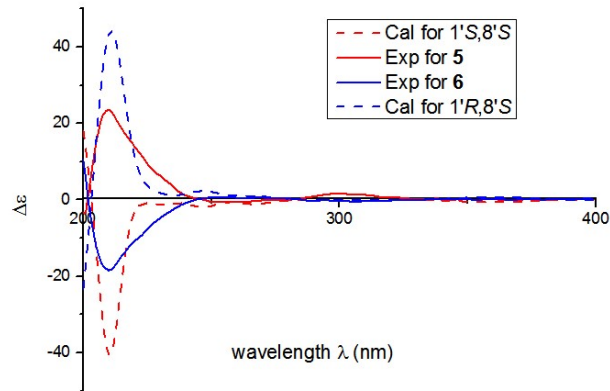

**Figure S63.** The calculated and the experimental ECD spectra of 5 and 6.

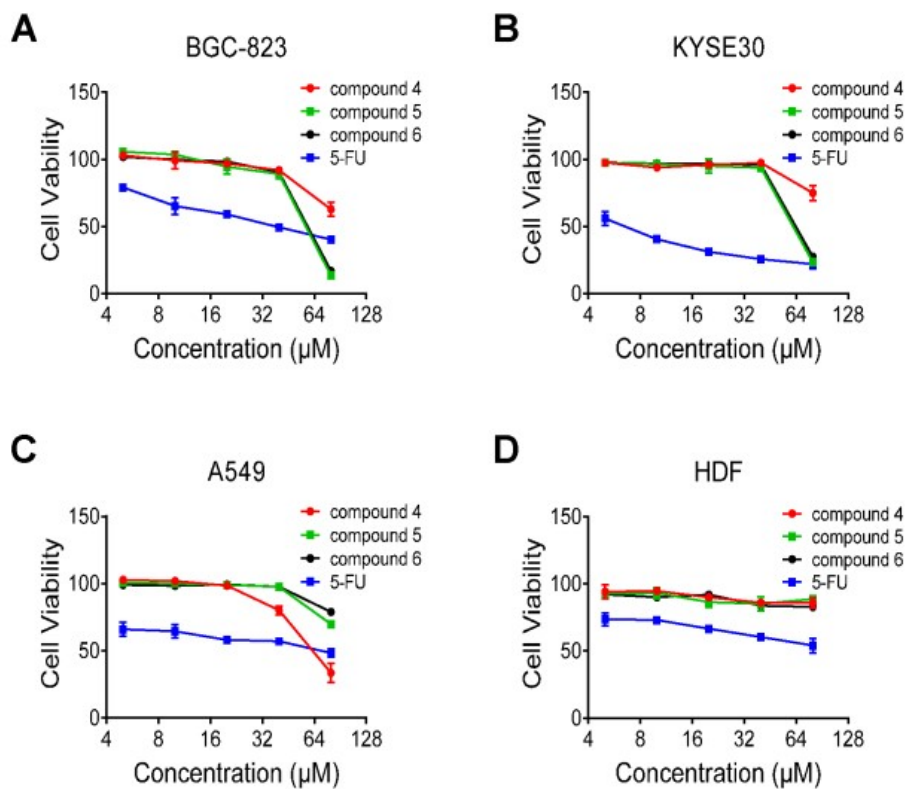

**Figure S64.** Cytotoxic effects of compound-4, compound-5, compound-6 and 5-FU on human cancer cells (A, B, C) and normal cells (D) Cells were treated with various concentrations of compound-4, compound-5, compound-6 and 5-FU for 48 h. Cytotoxic effect of the compounds was determined by CCK8 assay. Percentages of viable cells were calculated by comparing treated and solvent control cells. Data are the mean  $\pm$  S.D. of three replicates.
